# Supplementary material for: Pycnidiophorones A–D, four new cytochalasans from the wetland derived fungus Pycnidiophora dispersa
Source: PubMed Central journal article supplement — RSC Adv. 2020 Nov 5;10(66):40384–90. doi: 10.1039/d0ra08072a (PMC9057502; doi:10.1039/d0ra08072a), 2020-11-05

Electronic Supplementary Material (ESI) for RSC Advances.  
This journal is © The Royal Society of Chemistry 2020

## Supplementary material

### **Pycnidiophorones A–D, four new cytochalasans from a wetland derived fungus *Pycnidiophora dispersa***

Chen Zhao<sup>a</sup>, Gaoran Liu<sup>b</sup>, Xingzhong Liu<sup>b</sup>, Lan Zhang<sup>a</sup>, Lin Li<sup>a,\*</sup>, and Ling Liu<sup>b,\*</sup>

<sup>a</sup>*Department of Pharmacy, Xuanwu Hospital of Capital Medical University, National Clinical Research Center for Geriatric Diseases, Beijing Engineering Research Center for Nervous System Drugs, Beijing Institute for Brain Disorders, Key Laboratory for Neurodegenerative Diseases of Ministry of Education, Beijing 100053, China*

<sup>b</sup>*State Key Laboratory of Mycology, Institute of Microbiology, Chinese Academy of Sciences, Beijing 100101, People's Republic of China*

\*Corresponding authors.

Email address: liul@im.ac.cn (Ling Liu), linlixw@126.com (Lin Li)

| <b>Contents</b>                                                                                                               | <b>Page</b> |
|-------------------------------------------------------------------------------------------------------------------------------|-------------|
| 1) <b>Figure S1.</b> $^1\text{H}$ NMR spectrum of Pycnidiophorone A ( <b>1</b> ; 500 MHz, $\text{CDCl}_3$ )                   | 5           |
| 2) <b>Figure S2.</b> $^{13}\text{C}$ NMR spectrum of Pycnidiophorone A ( <b>1</b> ; 125 MHz, $\text{CDCl}_3$ )                | 6           |
| 3) <b>Figure S3.</b> HSQC spectrum of Pycnidiophorone A ( <b>1</b> ; 500 MHz, $\text{CDCl}_3$ )                               | 7           |
| 4) <b>Figure S4.</b> $^1\text{H}$ - $^1\text{H}$ COSY spectrum of Pycnidiophorone A ( <b>1</b> ; 500 MHz, $\text{CDCl}_3$ )   | 8           |
| 5) <b>Figure S5.</b> HMBC spectrum of Pycnidiophorone A ( <b>1</b> ; 500 MHz, $\text{CDCl}_3$ )                               | 9           |
| 6) <b>Figure S6.</b> NOESY spectrum of Pycnidiophorone A ( <b>1</b> ; 500 MHz, $\text{CDCl}_3$ )                              | 10          |
| 7) <b>Figure S7.</b> $^1\text{H}$ NMR spectrum of Pycnidiophorone B ( <b>2</b> ; 600 MHz, $\text{CDCl}_3$ )                   | 11          |
| 8) <b>Figure S8.</b> $^{13}\text{C}$ NMR spectrum of Pycnidiophorone B ( <b>2</b> ; 150 MHz, $\text{CDCl}_3$ )                | 12          |
| 9) <b>Figure S9.</b> HSQC spectrum of Pycnidiophorone B ( <b>2</b> ; 600 MHz, $\text{CDCl}_3$ )                               | 13          |
| 10) <b>Figure S10.</b> $^1\text{H}$ - $^1\text{H}$ COSY spectrum of Pycnidiophorone B ( <b>2</b> ; 600 MHz, $\text{CDCl}_3$ ) | 14          |
| 11) <b>Figure S11.</b> HMBC spectrum of Pycnidiophorone B ( <b>2</b> ; 600 MHz, $\text{CDCl}_3$ )                             | 15          |
| 12) <b>Figure S12.</b> NOESY spectrum of Pycnidiophorone B ( <b>2</b> ; 600 MHz, $\text{CDCl}_3$ )                            | 16          |
| 13) <b>Figure S13.</b> $^1\text{H}$ NMR spectrum of Pycnidiophorone C ( <b>3</b> ; 400 MHz, $\text{CDCl}_3$ )                 | 17          |
| 14) <b>Figure S14.</b> $^{13}\text{C}$ NMR spectrum of Pycnidiophorone C ( <b>3</b> ; 100 MHz, $\text{CDCl}_3$ )              | 18          |
| 15) <b>Figure S15.</b> HSQC spectrum of Pycnidiophorone C ( <b>3</b> ; 400 MHz, $\text{CDCl}_3$ )                             | 19          |
| 16) <b>Figure S16.</b> $^1\text{H}$ - $^1\text{H}$ COSY spectrum of Pycnidiophorone C ( <b>3</b> ; 400 MHz, $\text{CDCl}_3$ ) | 20          |
| 17) <b>Figure S17.</b> HMBC spectrum of Pycnidiophorone C ( <b>3</b> ; 400 MHz, $\text{CDCl}_3$ )                             | 21          |
| 18) <b>Figure S18.</b> NOESY spectrum of Pycnidiophorone C ( <b>3</b> ; 400 MHz, $\text{CDCl}_3$ )                            | 22          |
| 19) <b>Figure S19.</b> $^1\text{H}$ NMR spectrum of Pycnidiophorone D ( <b>4</b> ; 600 MHz, $\text{CDCl}_3$ )                 | 23          |
| 20) <b>Figure S20.</b> $^{13}\text{C}$ NMR spectrum of Pycnidiophorone D ( <b>4</b> ; 150 MHz, $\text{CDCl}_3$ )              | 24          |

|                                                                                                                                    |    |
|------------------------------------------------------------------------------------------------------------------------------------|----|
| 21) <b>Figure S21.</b> HSQC spectrum of Pycnidiophorone D ( <b>4</b> ; 600 MHz, CDCl <sub>3</sub> )                                | 25 |
| 22) <b>Figure S22.</b> <sup>1</sup> H- <sup>1</sup> H COSY spectrum of Pycnidiophorone D ( <b>4</b> ; 600 MHz, CDCl <sub>3</sub> ) | 26 |
| 23) <b>Figure S23.</b> HMBC spectrum of Pycnidiophorone D ( <b>4</b> ; 600 MHz, CDCl <sub>3</sub> )                                | 27 |
| 24) <b>Figure S24.</b> NOESY spectrum of Pycnidiophorone D ( <b>4</b> ; 600 MHz, CDCl <sub>3</sub> )                               | 28 |
| 25) <b>Figure S25.</b> Relative configurations and the optimized conformers for <b>1</b>                                           | 29 |
| 26) <b>Figure S26.</b> Relative configurations and the optimized conformers for <b>3</b>                                           | 30 |
| 27) <b>Figure S27.</b> Experimental CD spectrum of <b>1</b> in MeOH                                                                | 31 |
| 28) <b>Figure S28.</b> Experimental CD spectrum of <b>2</b> in MeOH                                                                | 32 |
| 29) <b>Figure S29.</b> Experimental CD spectrum of <b>3</b> in MeOH                                                                | 33 |
| 30) <b>Figure S30.</b> Experimental CD spectrum of <b>4</b> in MeOH                                                                | 34 |
| 31) <b>Figure S31.</b> UV spectrum of Pycnidiophorone A ( <b>1</b> ) in MeOH                                                       | 35 |
| 32) <b>Figure S32.</b> UV spectrum of Pycnidiophorone B ( <b>2</b> ) in MeOH                                                       | 36 |
| 33) <b>Figure S33.</b> UV spectrum of Pycnidiophorone C ( <b>3</b> ) in MeOH                                                       | 37 |
| 34) <b>Figure S34.</b> UV spectrum of Pycnidiophorone D ( <b>4</b> ) in MeOH                                                       | 38 |
| 35) <b>Figure S35.</b> IR spectrum of Pycnidiophorone A ( <b>1</b> )                                                               | 39 |
| 36) <b>Figure S36.</b> IR spectrum of Pycnidiophorone B ( <b>2</b> )                                                               | 40 |
| 37) <b>Figure S37.</b> IR spectrum of Pycnidiophorone C ( <b>3</b> )                                                               | 41 |
| 38) <b>Figure S38.</b> IR spectrum of Pycnidiophorone D ( <b>4</b> )                                                               | 42 |
| 39) <b>Figure S39.</b> HRESIMS spectrum of Pycnidiophorone A ( <b>1</b> )                                                          | 43 |
| 40) <b>Figure S40.</b> HRESIMS spectrum of Pycnidiophorone B ( <b>2</b> )                                                          | 44 |
| 41) <b>Figure S41.</b> HRESIMS spectrum of Pycnidiophorone C ( <b>3</b> )                                                          | 45 |



**Figure S1.**  $^1\text{H}$  NMR Spectrum of Pycnidiophorone A (**1**; 600 MHz,  $\text{CDCl}_3$ )

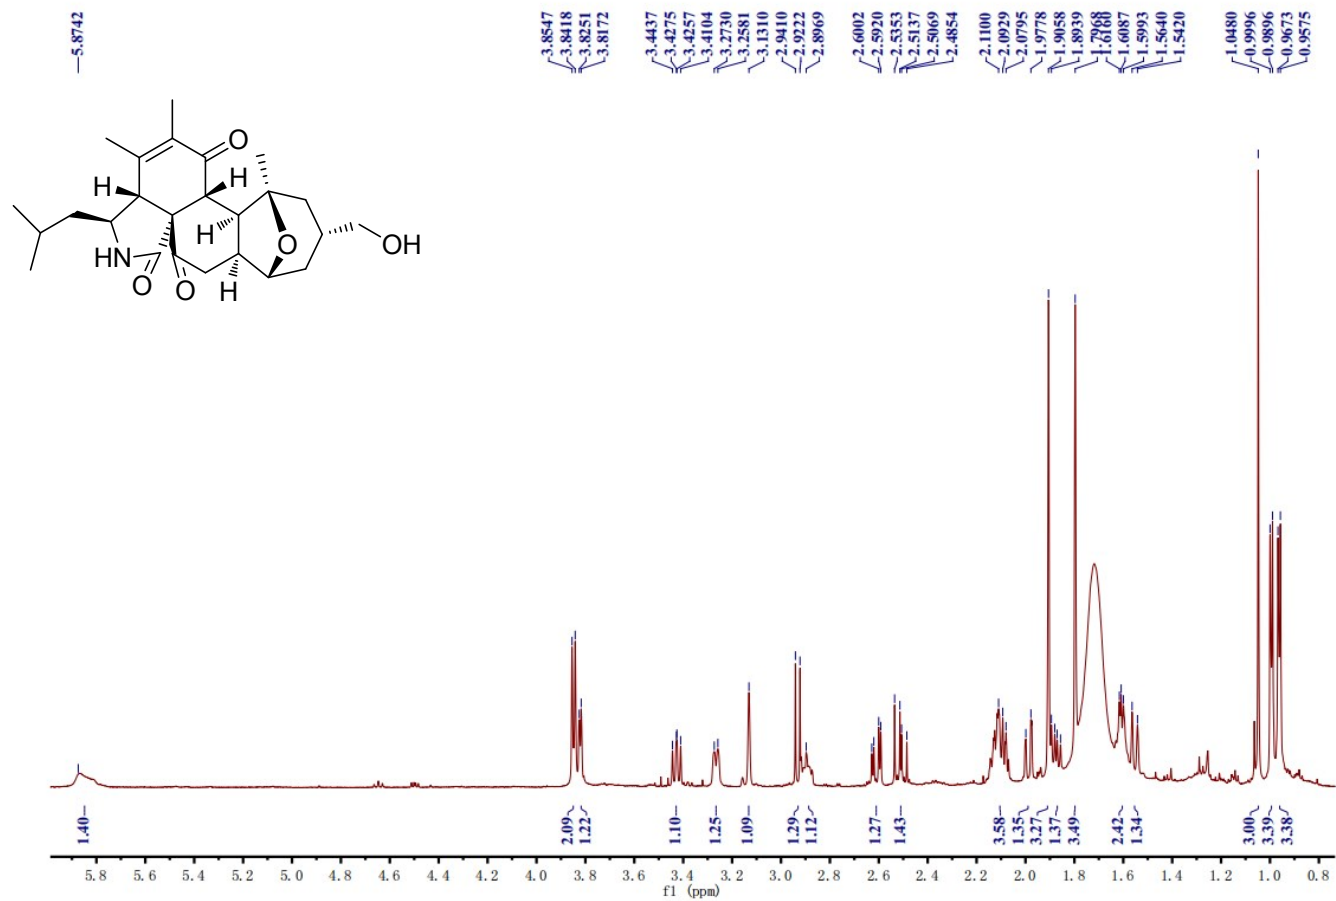

**Figure S2.**  $^{13}\text{C}$  NMR Spectrum of Pycnidiophorone A (**1**; 125 MHz,  $\text{CDCl}_3$ )

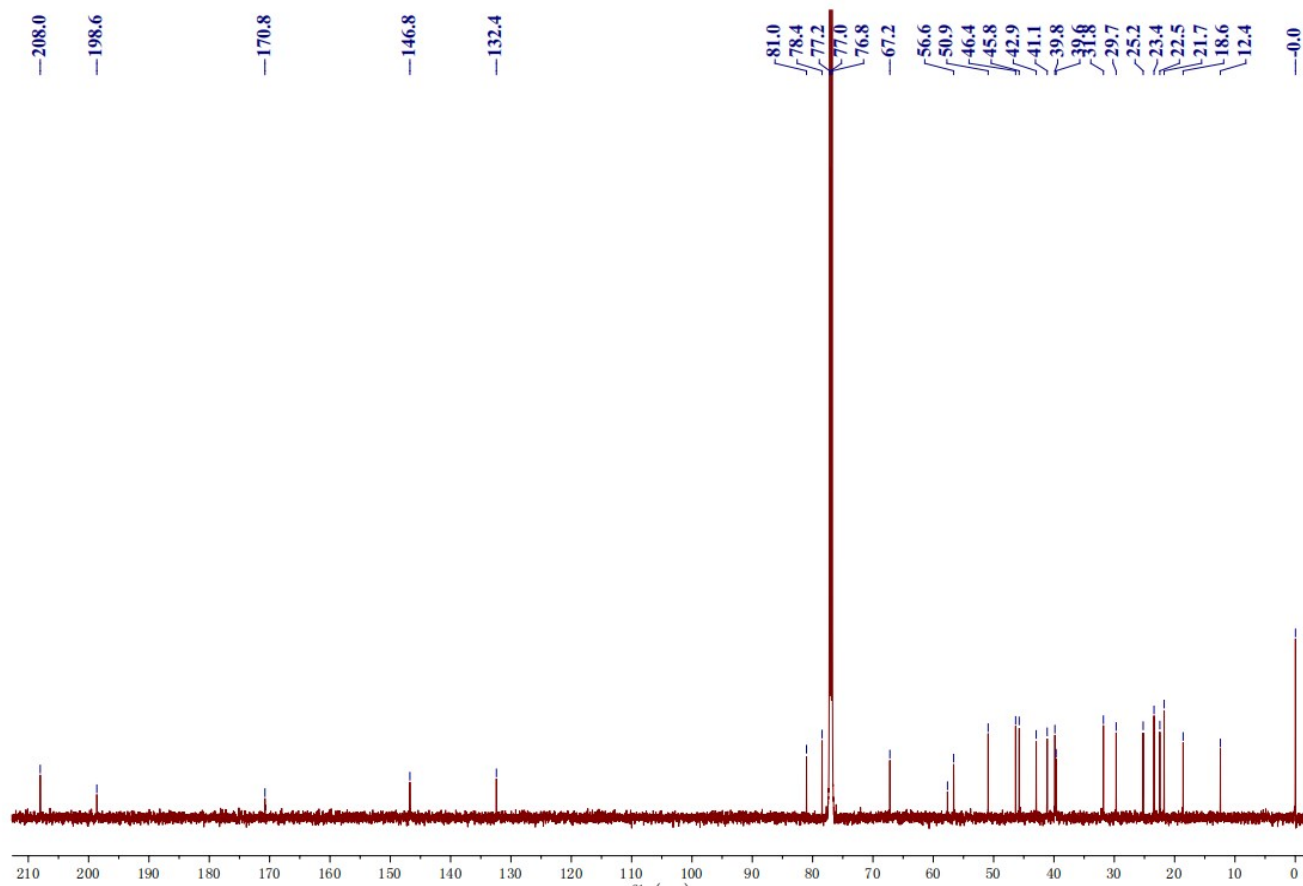

**Figure S3.** HSQC spectrum of Pycnidiophorone A (**1**; 500 MHz, CDCl<sub>3</sub>)

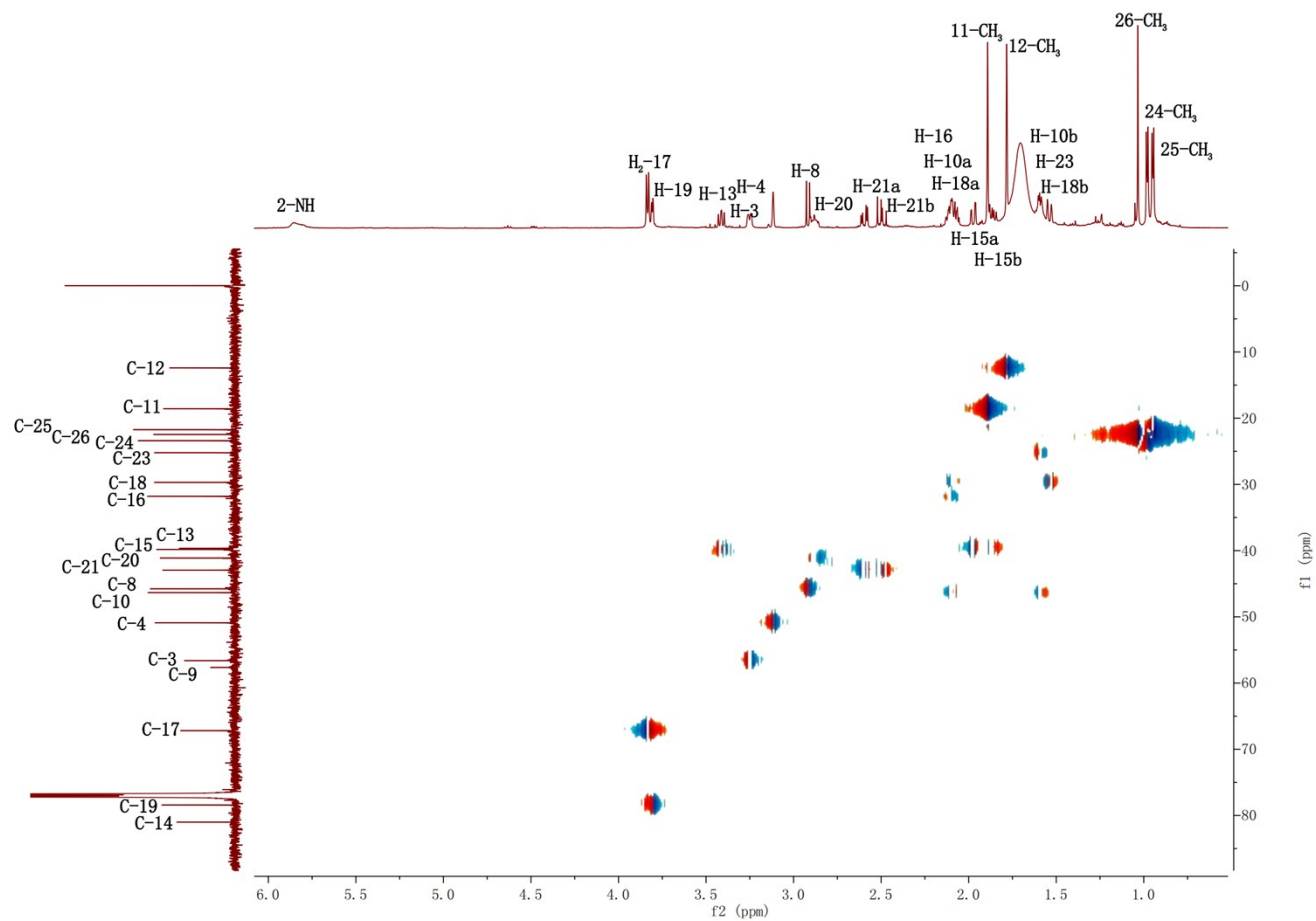

**Figure S4.**  $^1\text{H}$ - $^1\text{H}$  COSY spectrum of Pycnidiophorone A (**1**; 500 MHz,  $\text{CDCl}_3$ )

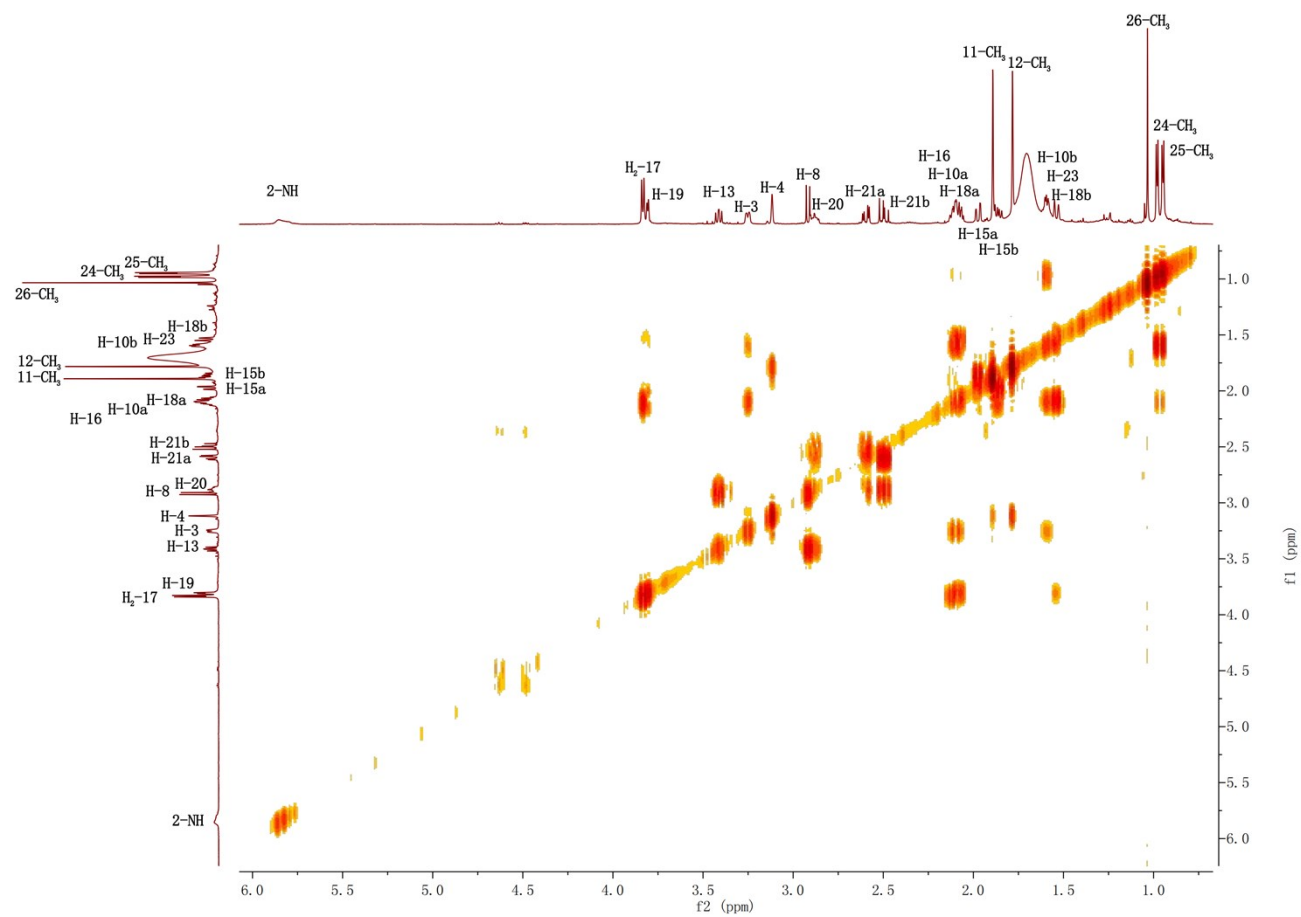



**Figure S5.** HMBC spectrum of Pycnidiophorone A (**1**; 500 MHz, CDCl<sub>3</sub>)

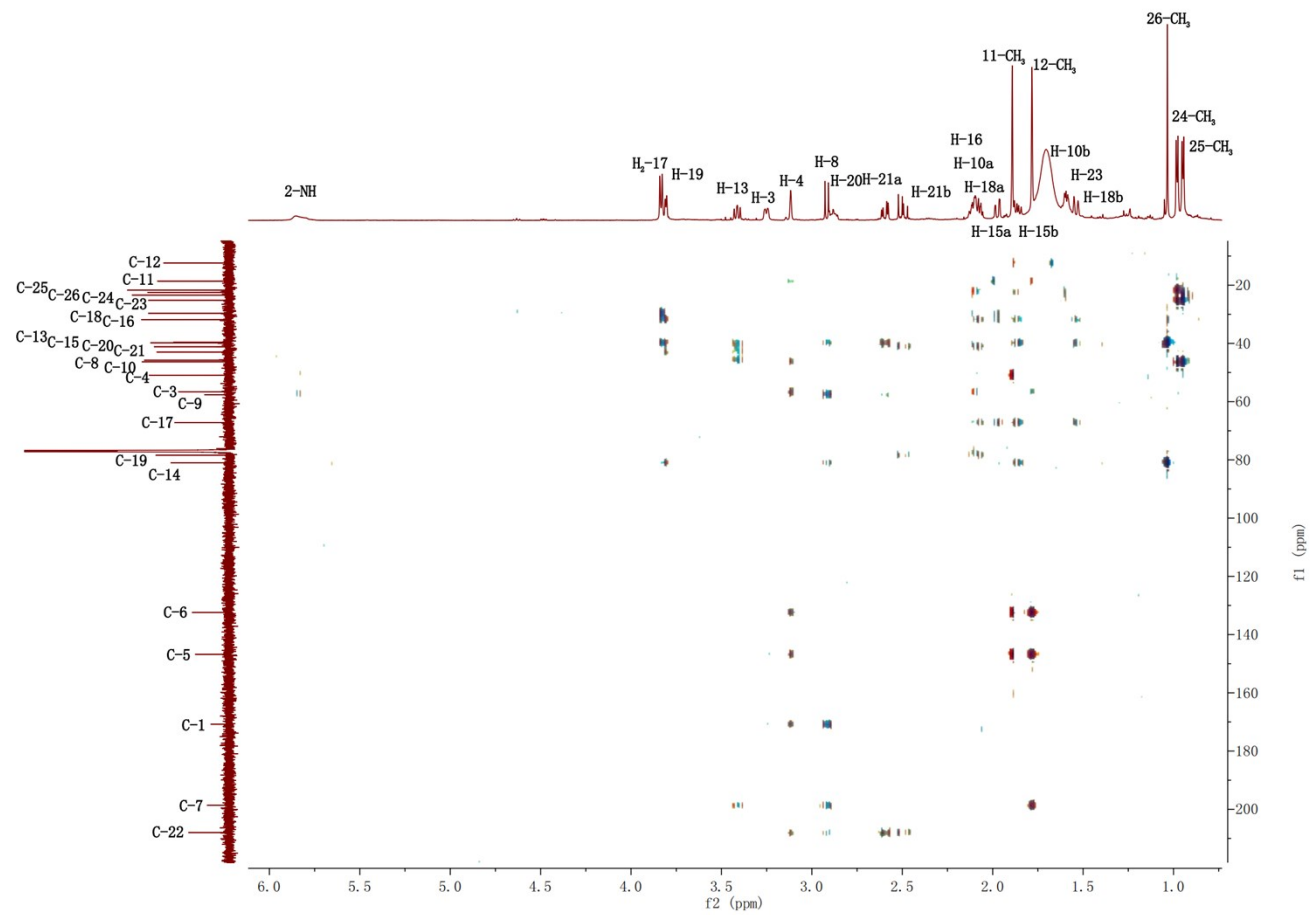

**Figure S6.** NOESY spectrum of Pycnidiophorone A (**1**; 500 MHz, CDCl<sub>3</sub>)

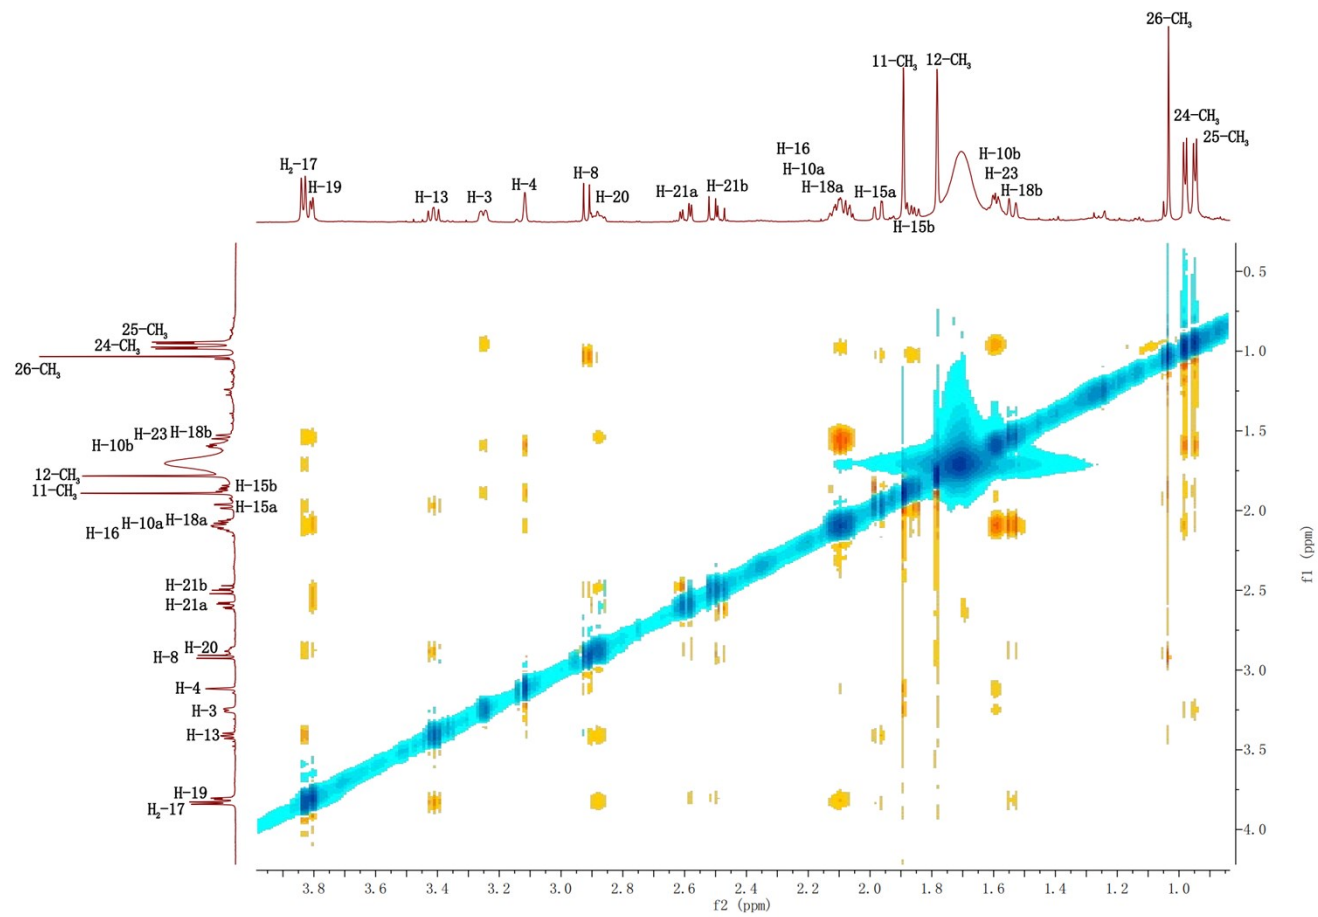

**Figure S7.**  $^1\text{H}$  NMR Spectrum of Pycnidiophorone B (**2**; 600 MHz,  $\text{CDCl}_3$ )

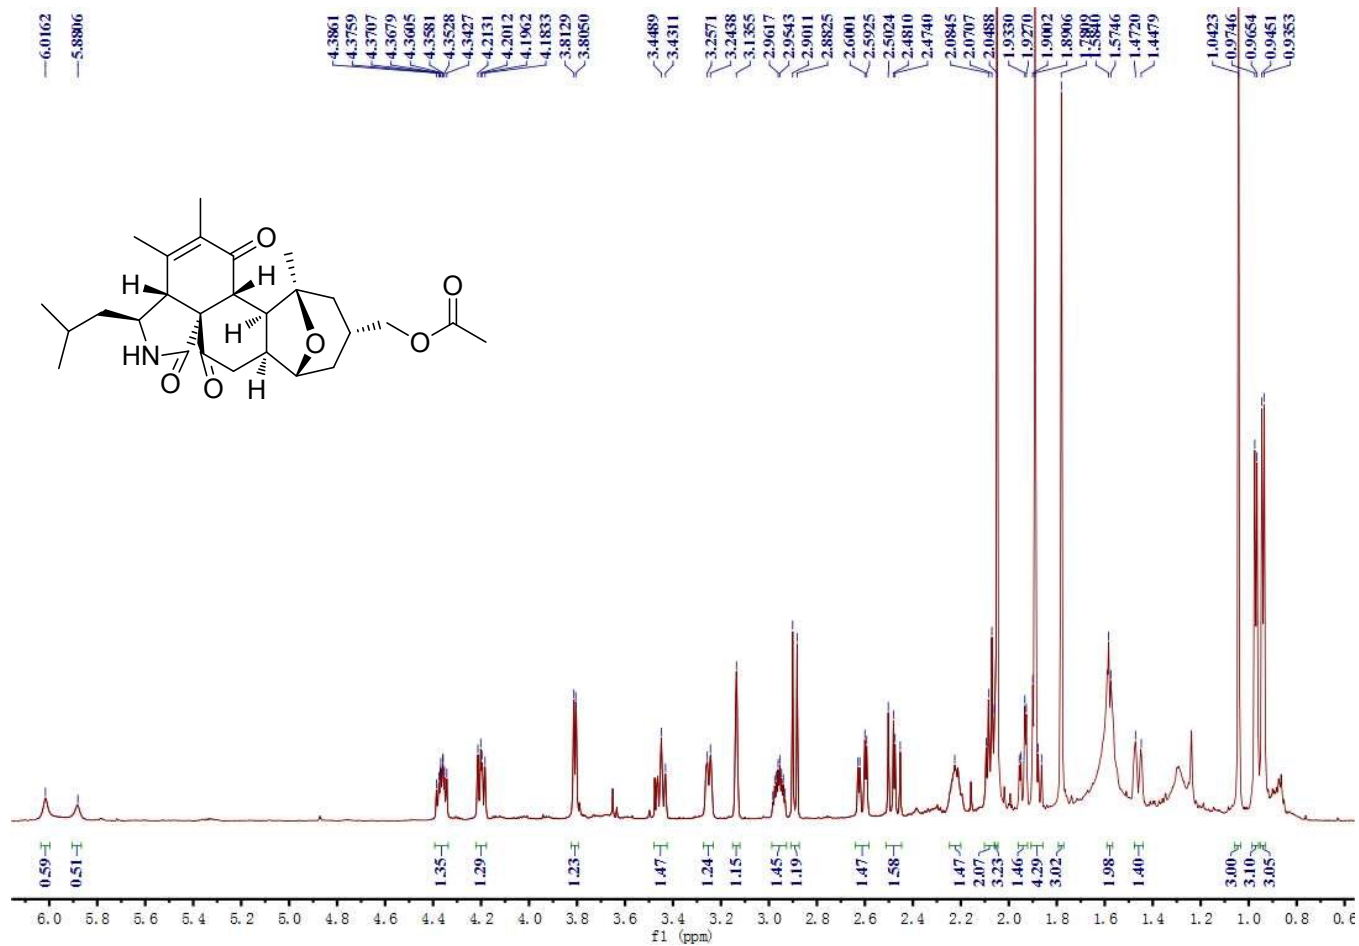

**Figure S8.**  $^{13}\text{C}$  NMR Spectrum of Pycnidiophorone B (**2**; 150 MHz,  $\text{CDCl}_3$ )

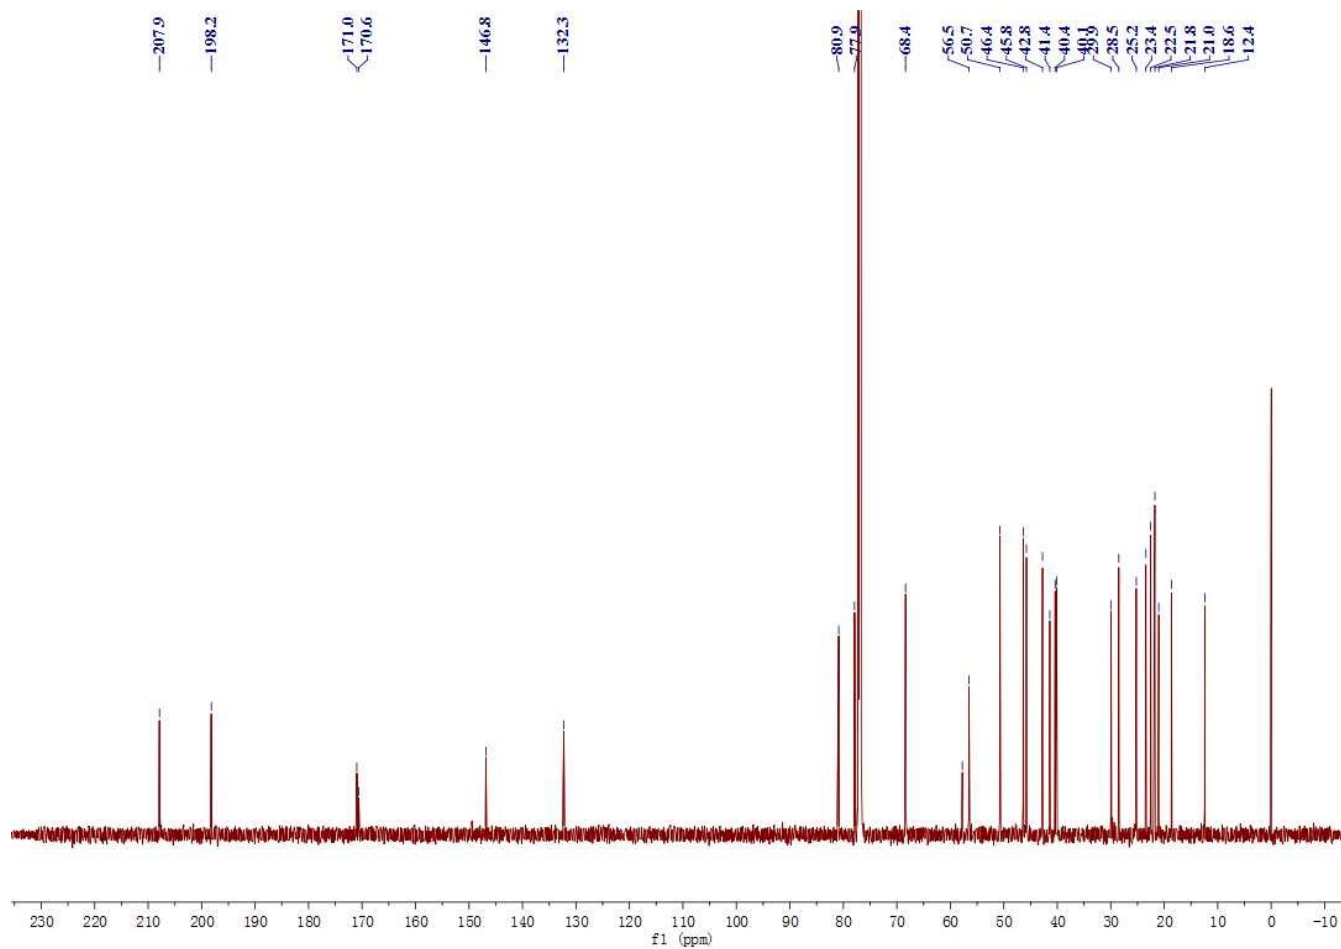

**Figure S9.** HSQC spectrum of Pycnidiophorone B (**2**; 600 MHz, CDCl<sub>3</sub>)

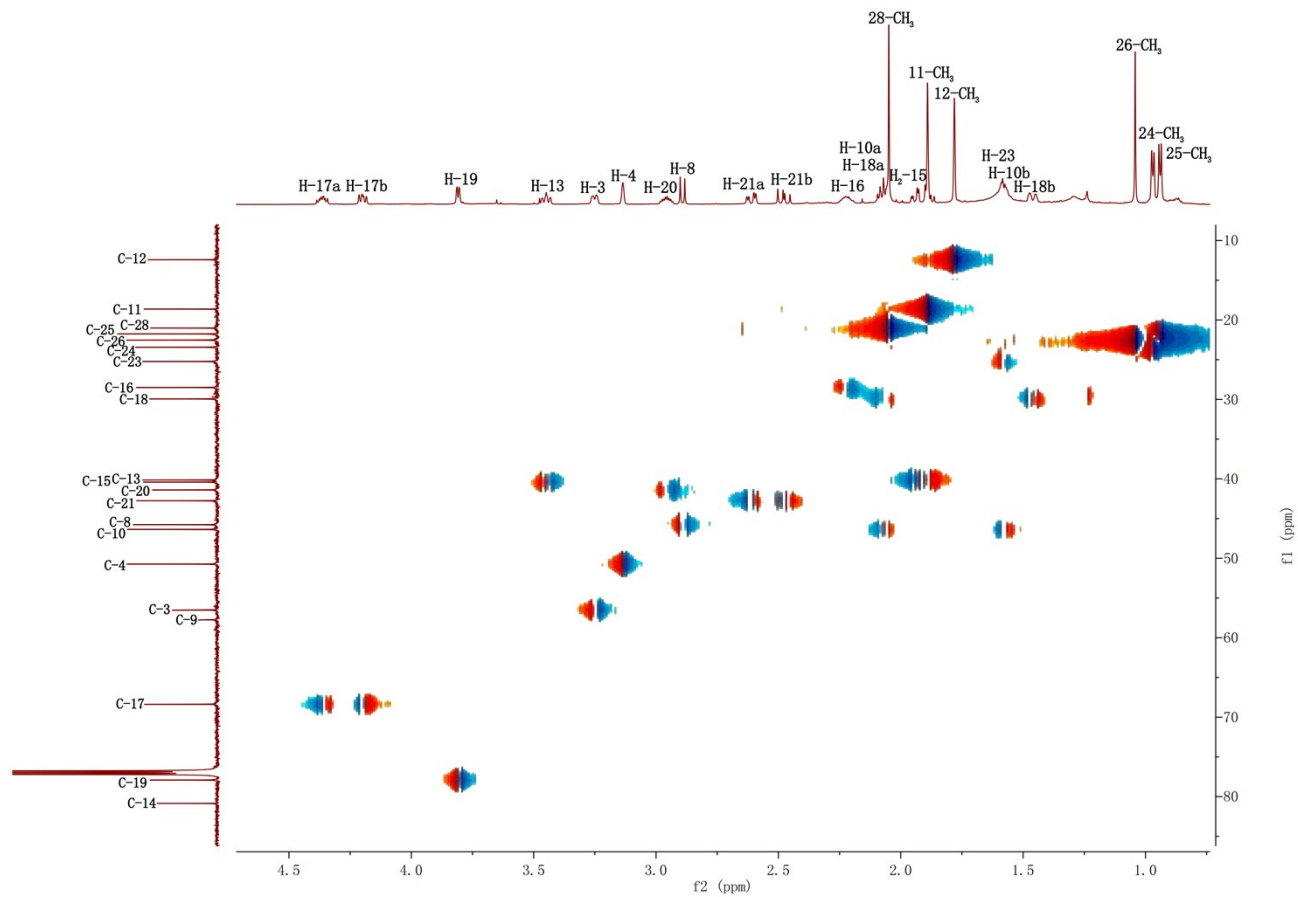

**Figure S10.**  $^1\text{H}$ - $^1\text{H}$  COSY spectrum of Pycnidiophorone B (**2**; 600 MHz,  $\text{CDCl}_3$ )

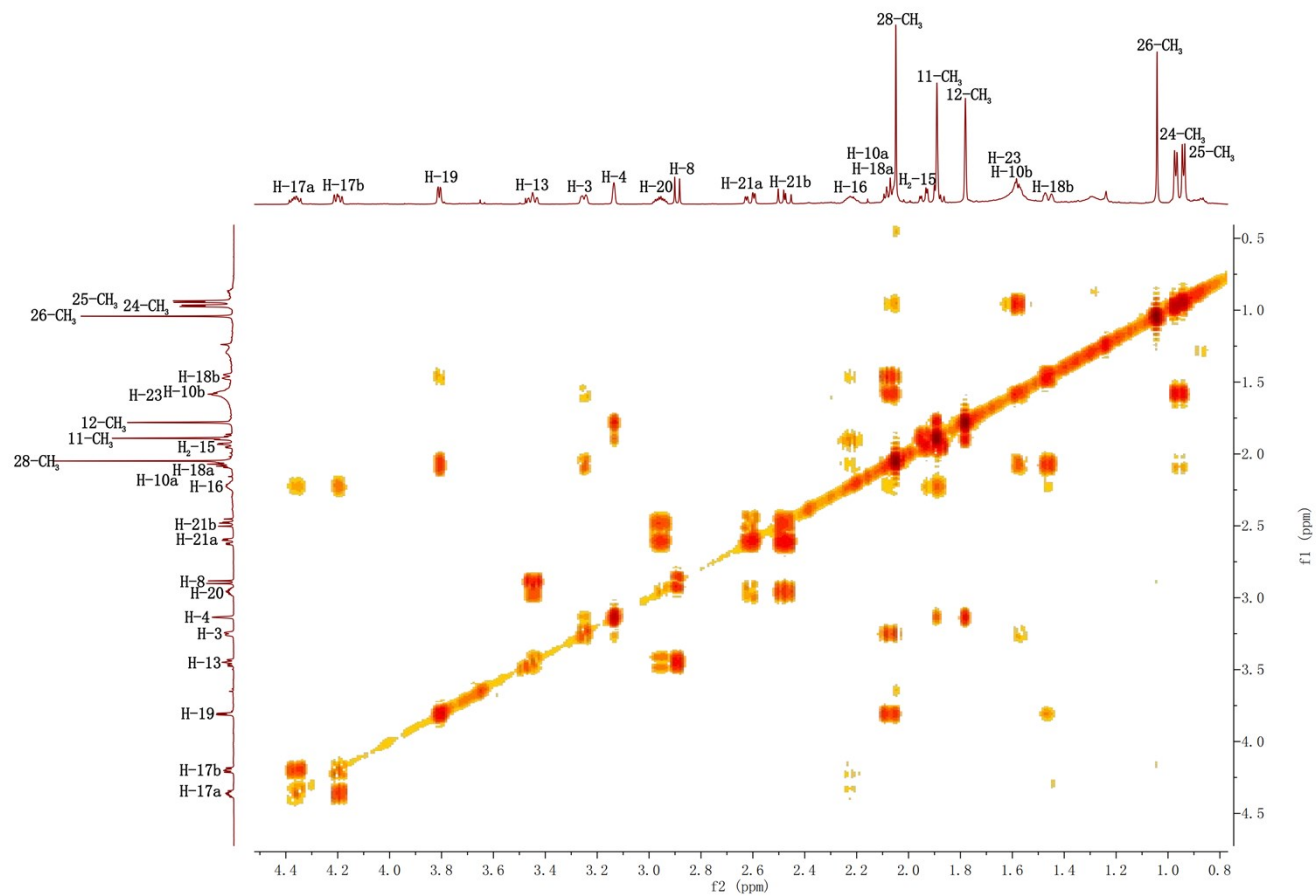

**Figure S11.** HMBC spectrum of Pycnidiophorone B (**2**; 600 MHz, CDCl<sub>3</sub>)

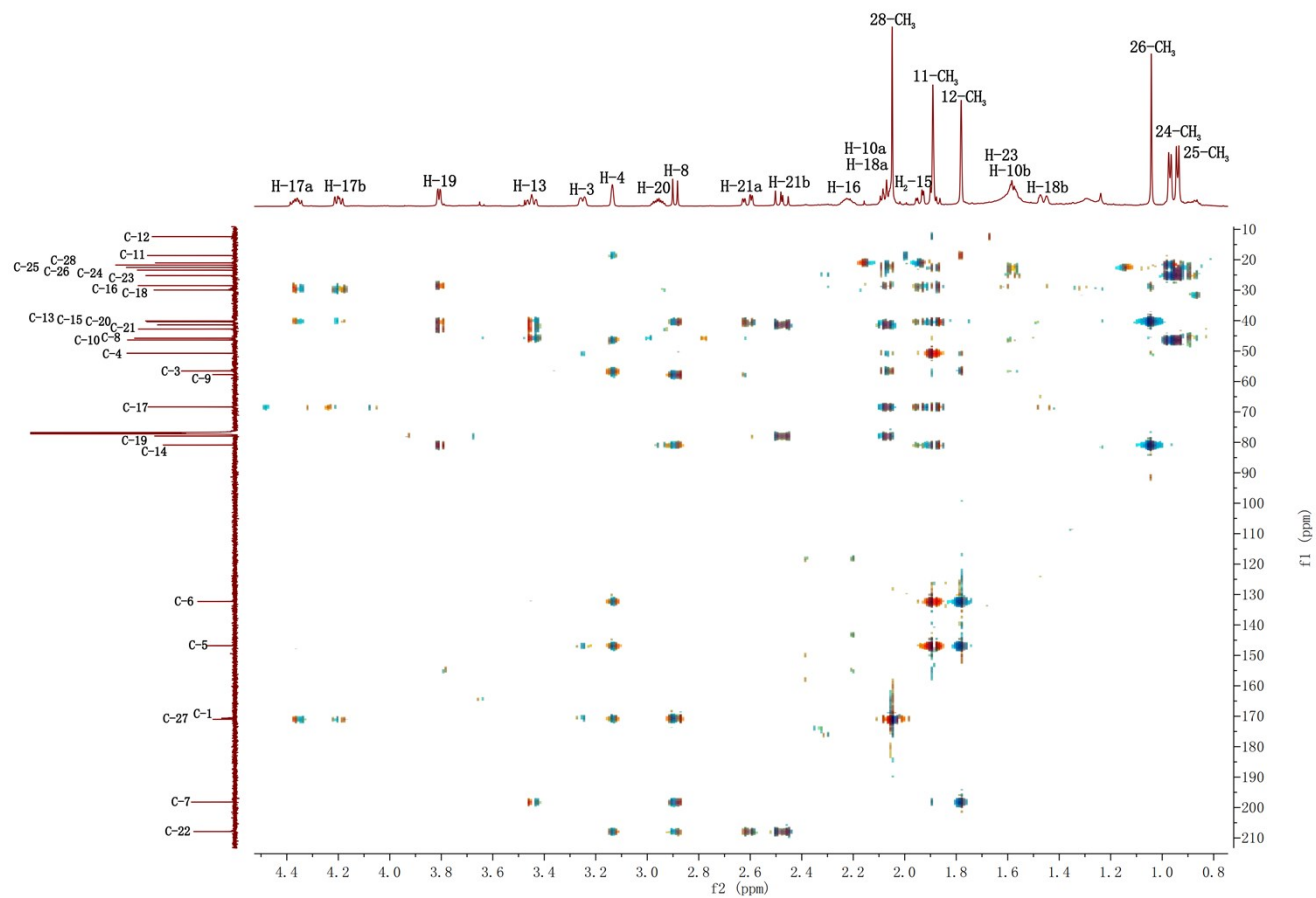

**Figure S12.** NOESY spectrum of Pycnidiophorone B (**2**; 600 MHz, CDCl<sub>3</sub>)

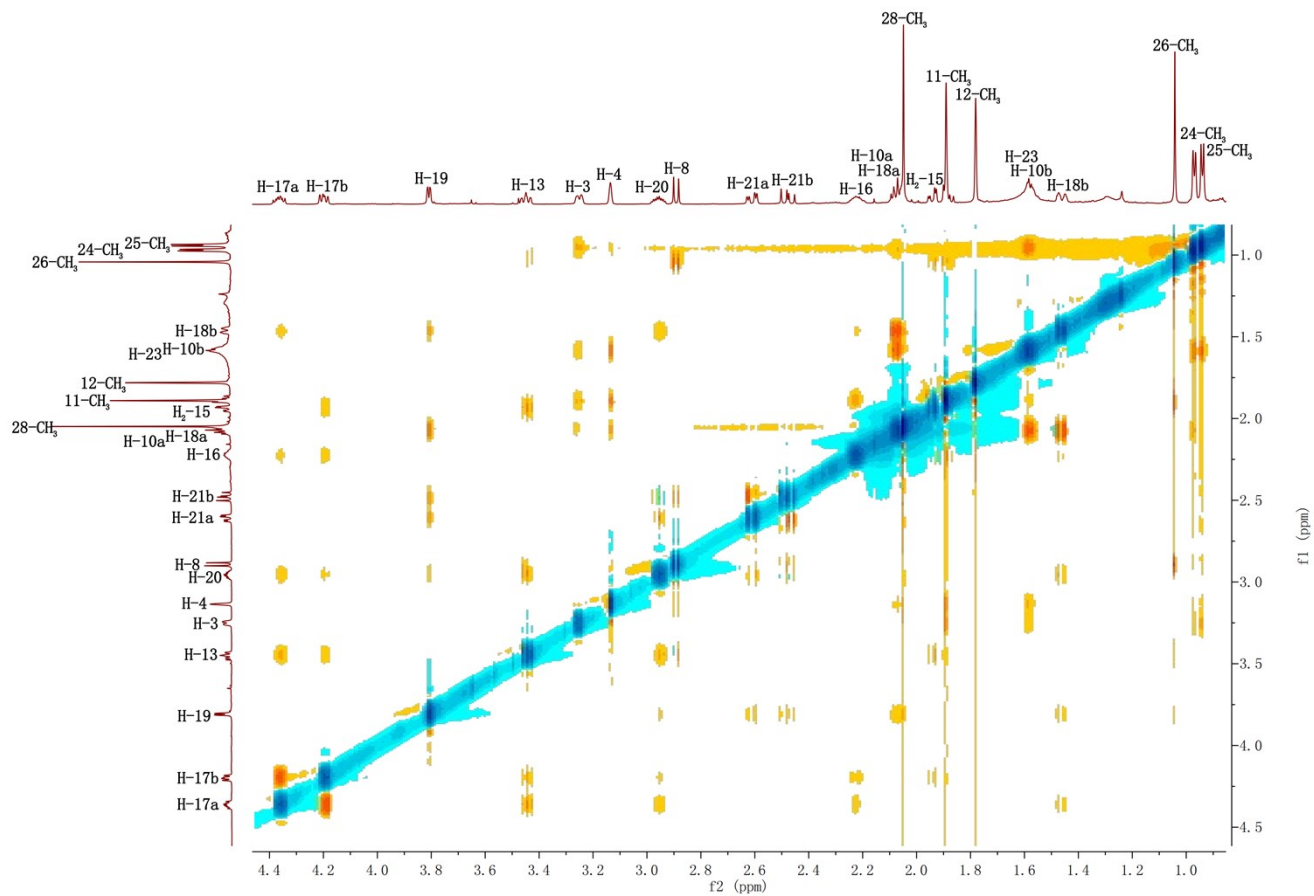



**Figure S13.**  $^1\text{H}$  NMR Spectrum of Pycnidiophorone C (**3**; 400 MHz,  $\text{CDCl}_3$ )

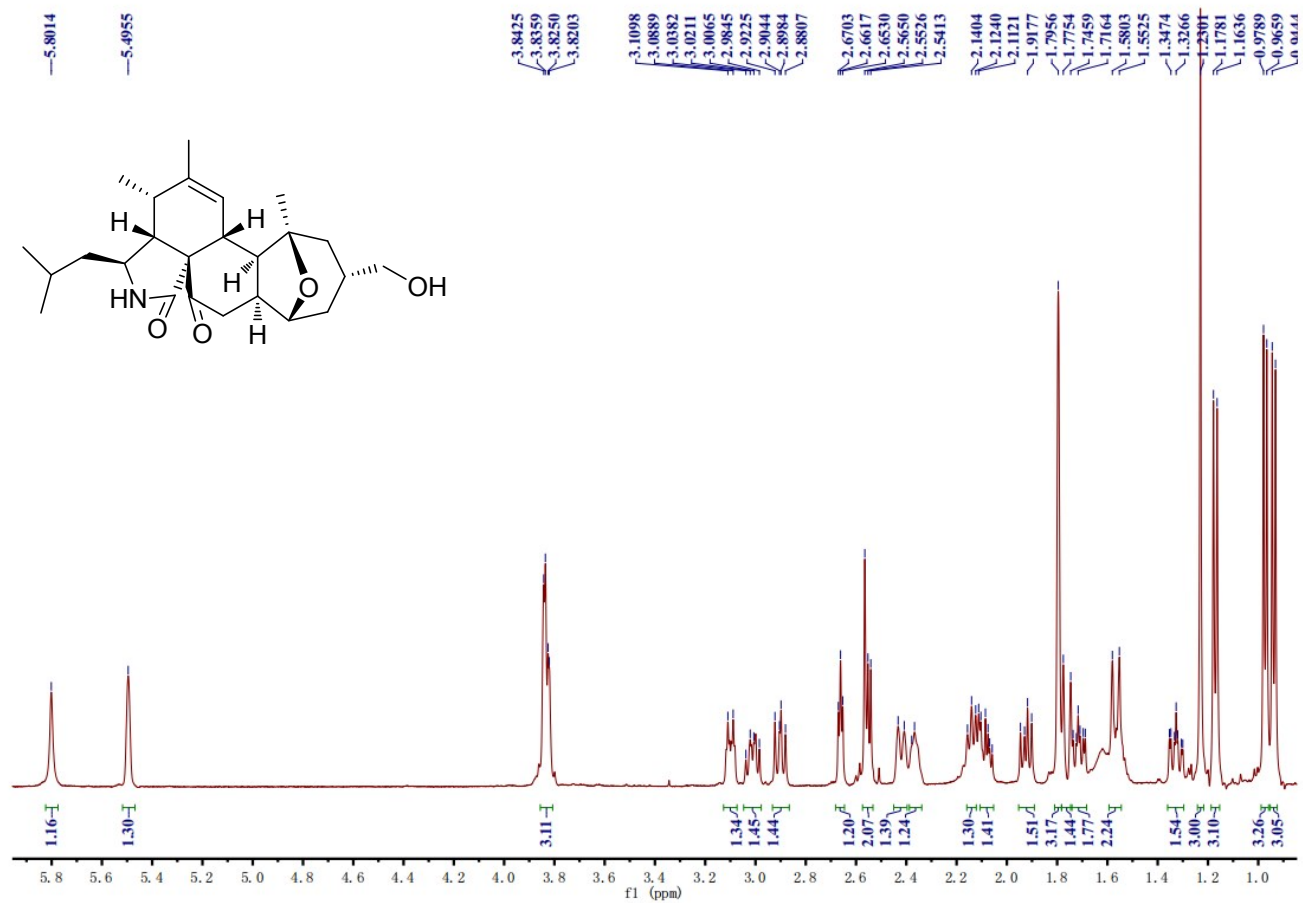

**Figure S14.**  $^{13}\text{C}$  NMR Spectrum of Pycnidiophorone C (**3**; 100 MHz,  $\text{CDCl}_3$ )

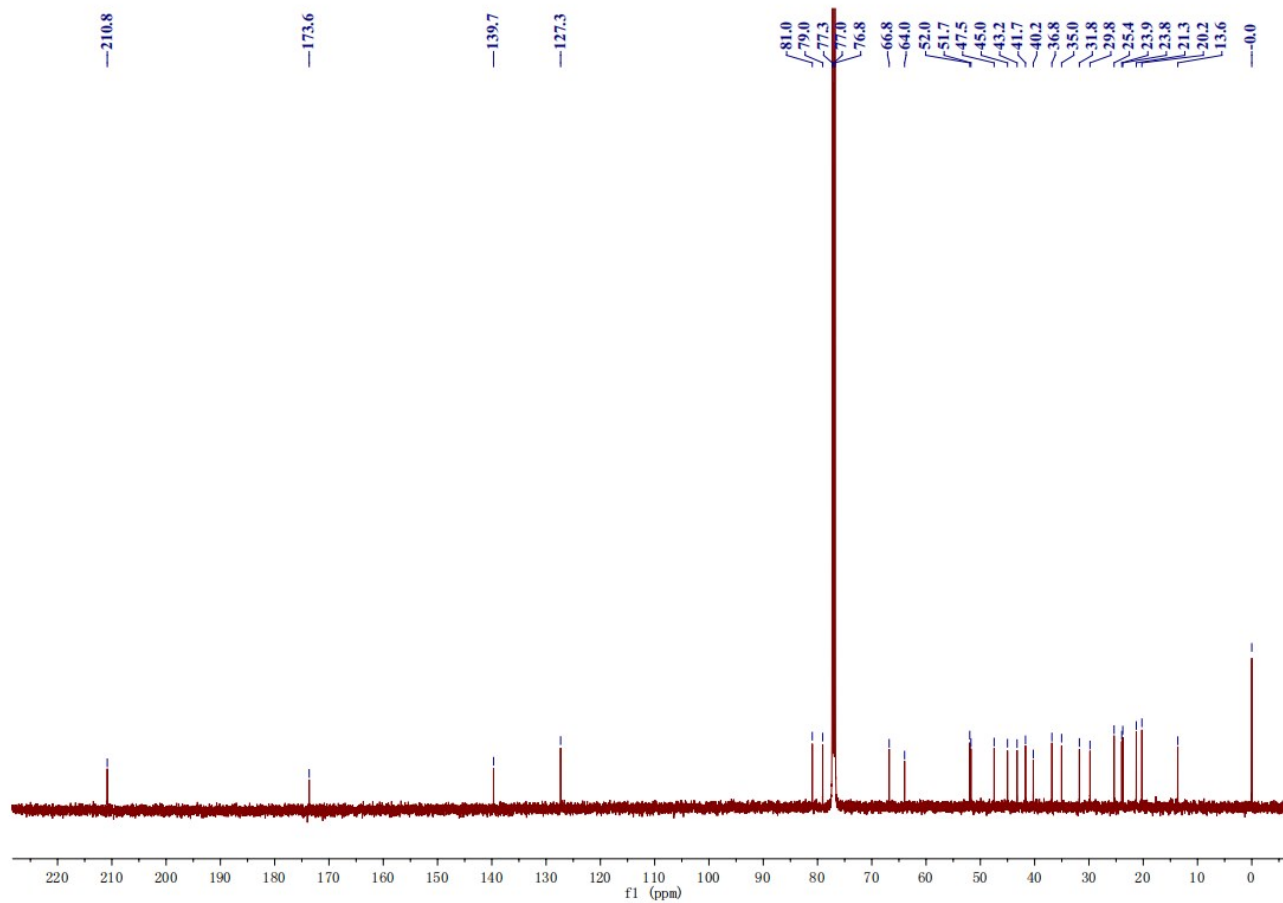

**Figure S15.** HSQC spectrum of Pycnidiophorone C (**3**; 400 MHz, CDCl<sub>3</sub>)

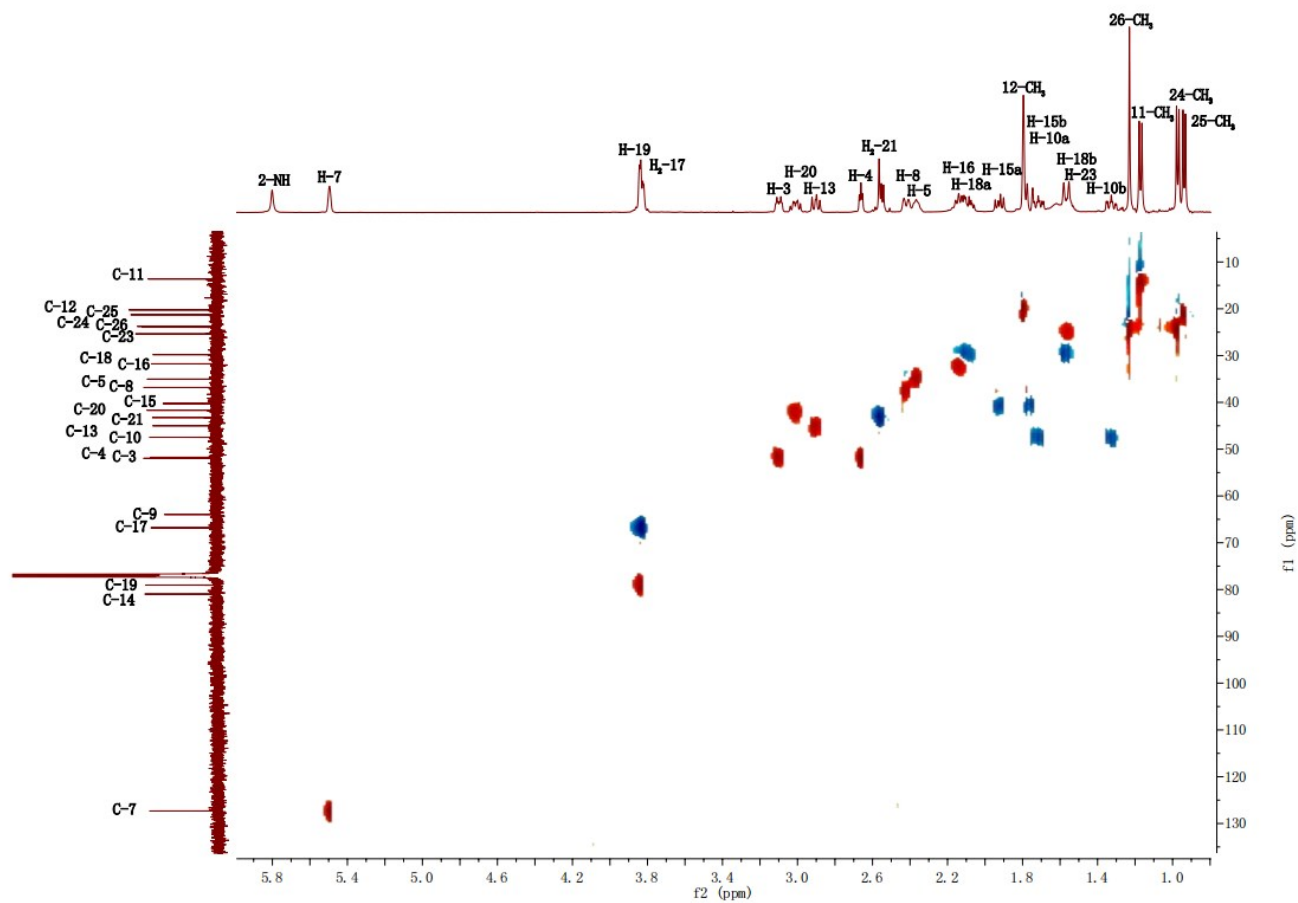

**Figure S16.**  $^1\text{H}$ - $^1\text{H}$  COSY spectrum of Pycnidiophorone C (**3**; 400 MHz,  $\text{CDCl}_3$ )

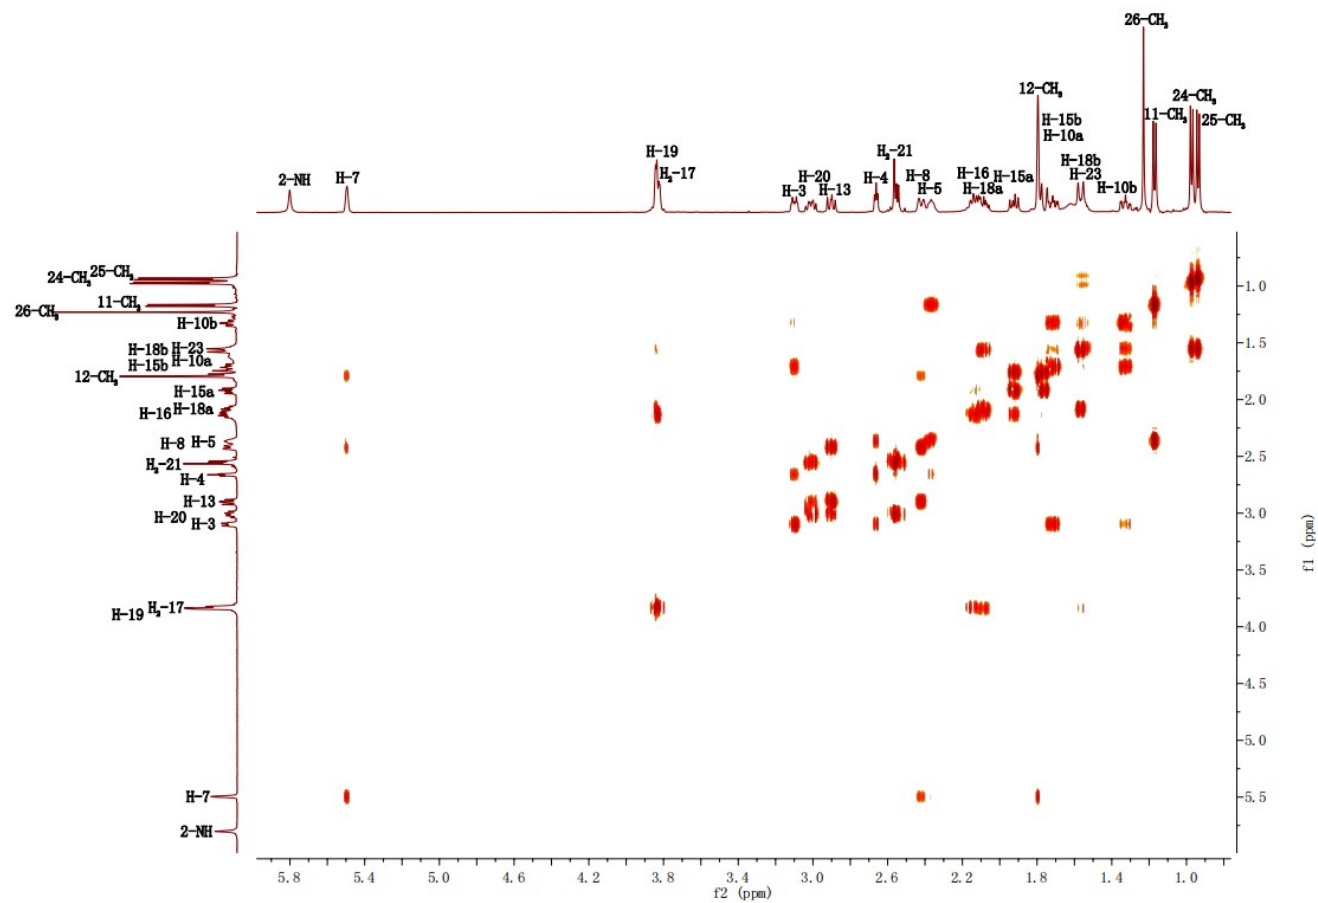

**Figure S17.** HMBC spectrum of Pycnidiophorone C (**3**; 400 MHz, CDCl<sub>3</sub>)

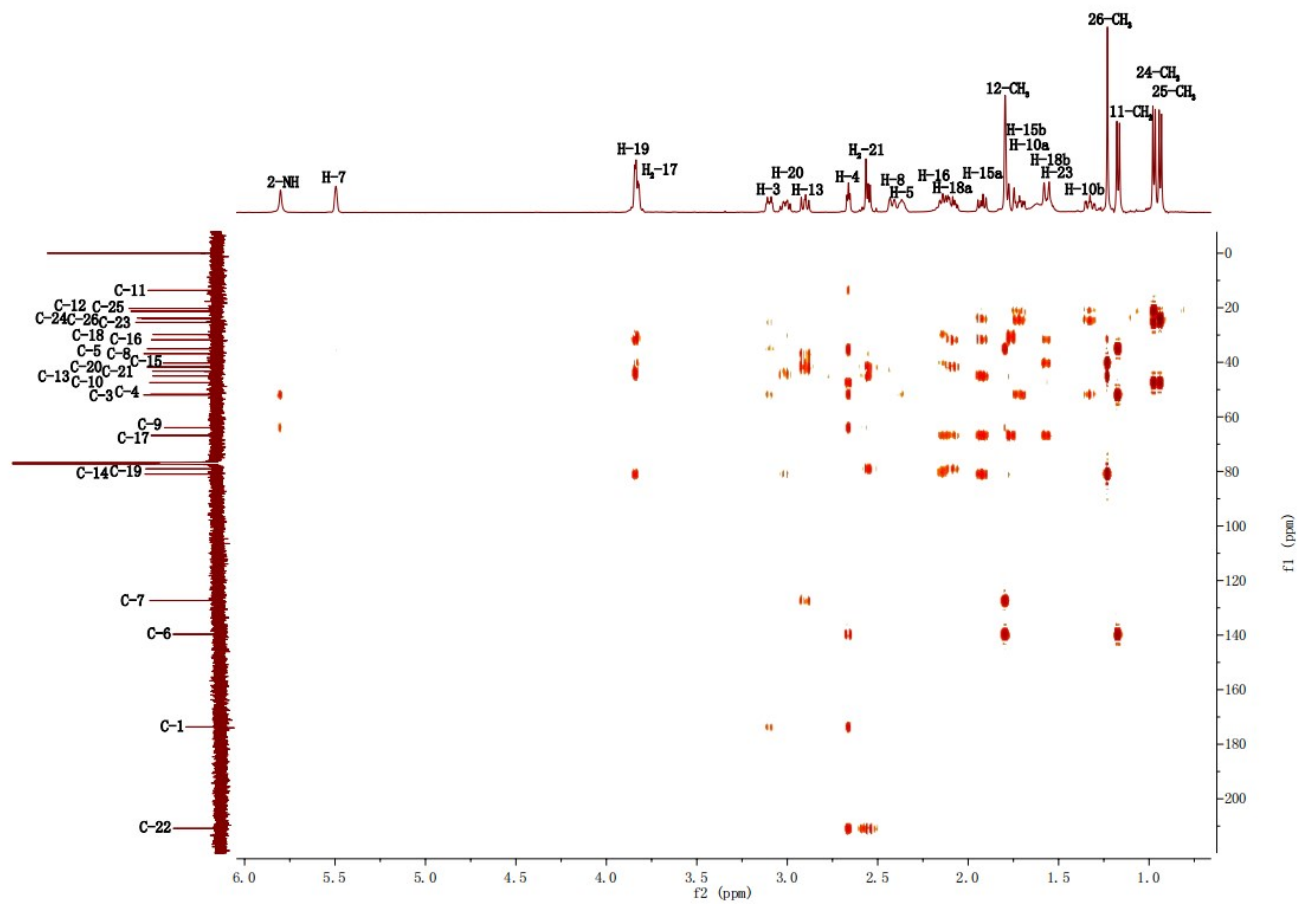

**Figure S18.** NOESY spectrum of Pycnidiophorone C (**3**; 400 MHz, CDCl<sub>3</sub>)

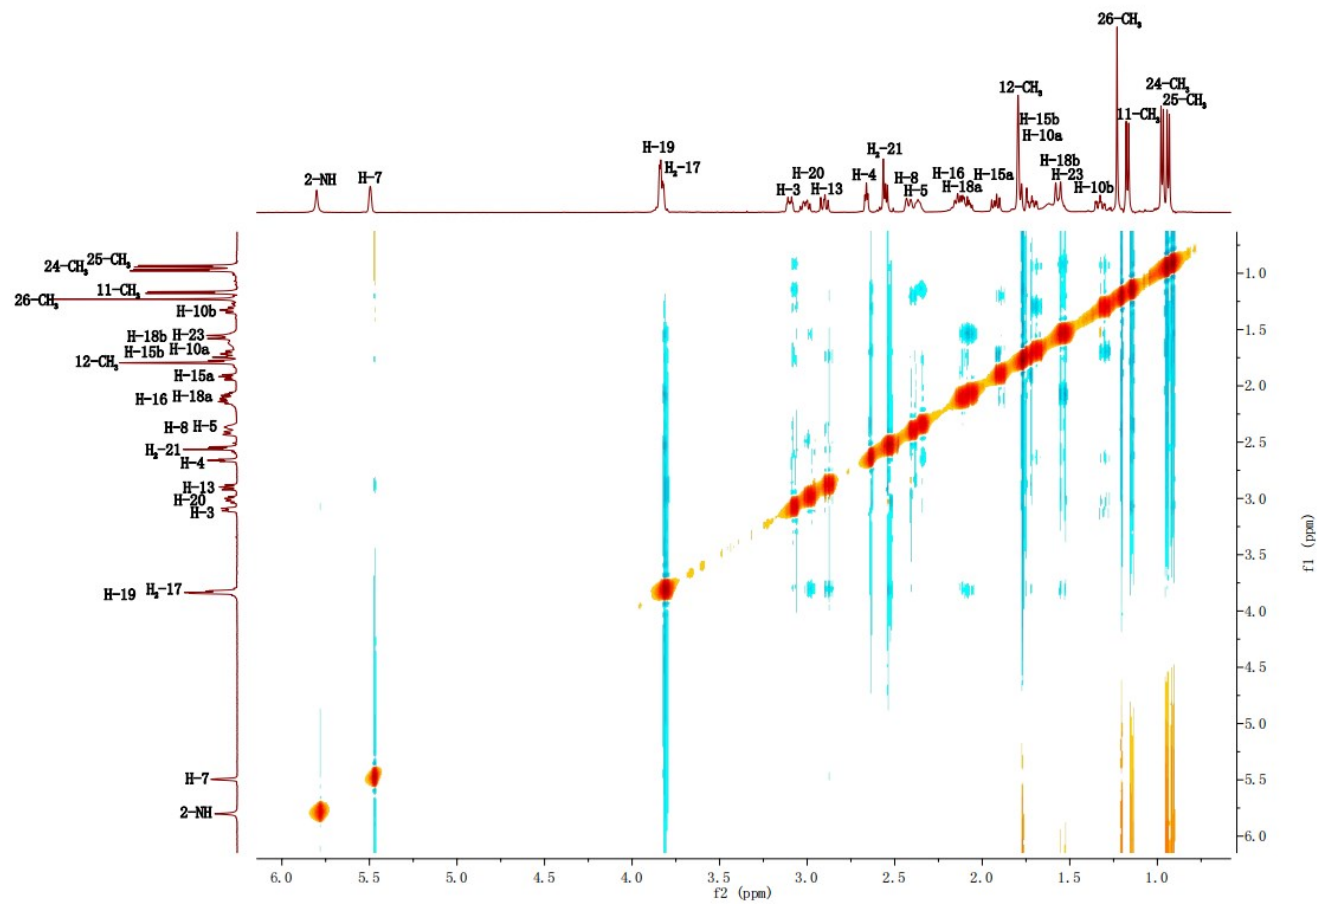

**Figure S19.**  $^1\text{H}$  NMR Spectrum of Pycnidiophorone D (**4**; 600 MHz,  $\text{CDCl}_3$ )

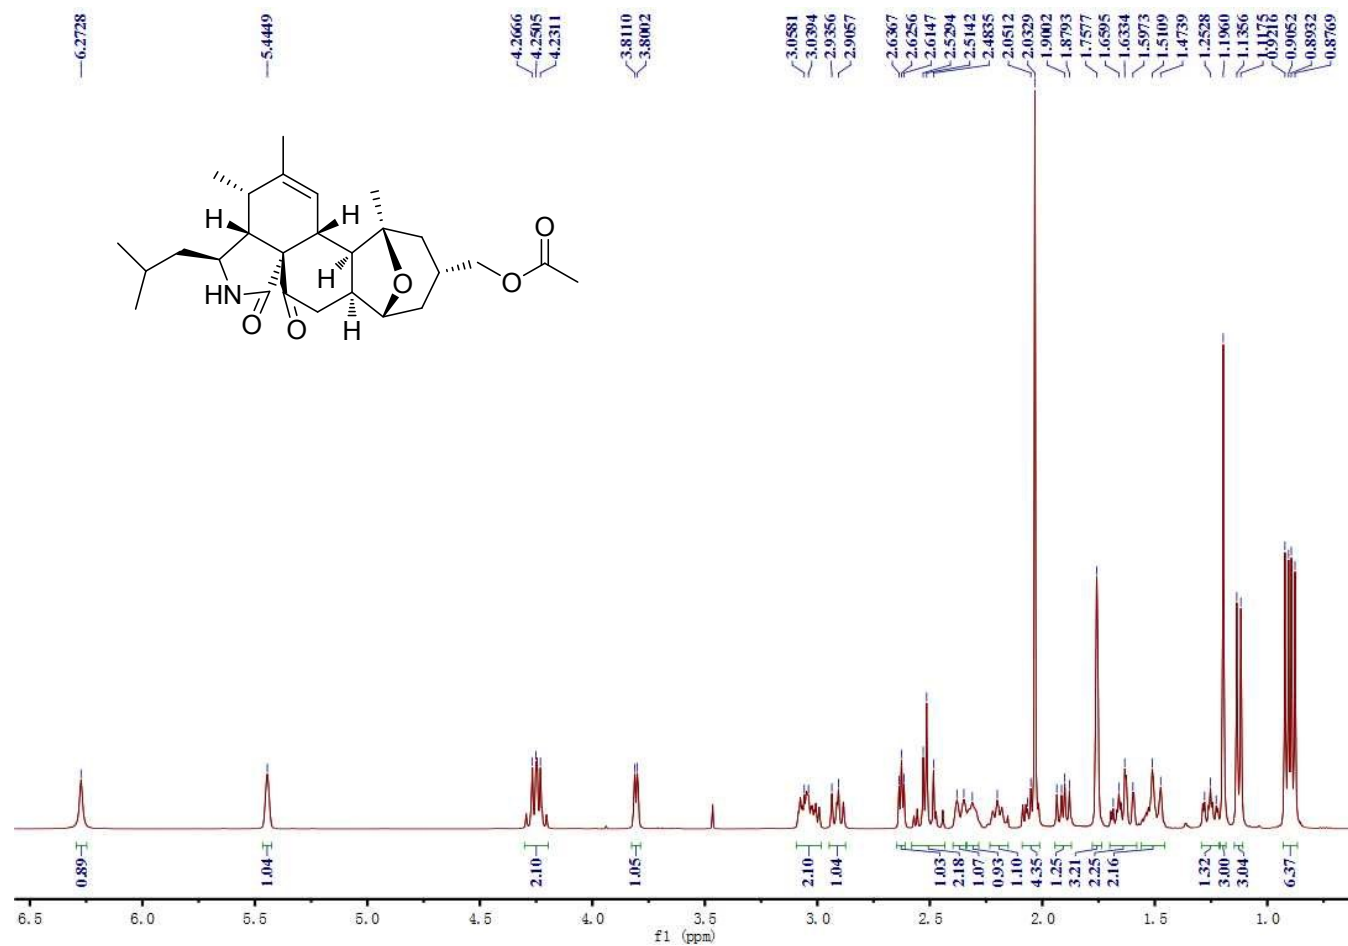

**Figure S20.**  $^{13}\text{C}$  NMR Spectrum of Pycnidiophorone D (**4**; 150 MHz,  $\text{CDCl}_3$ )

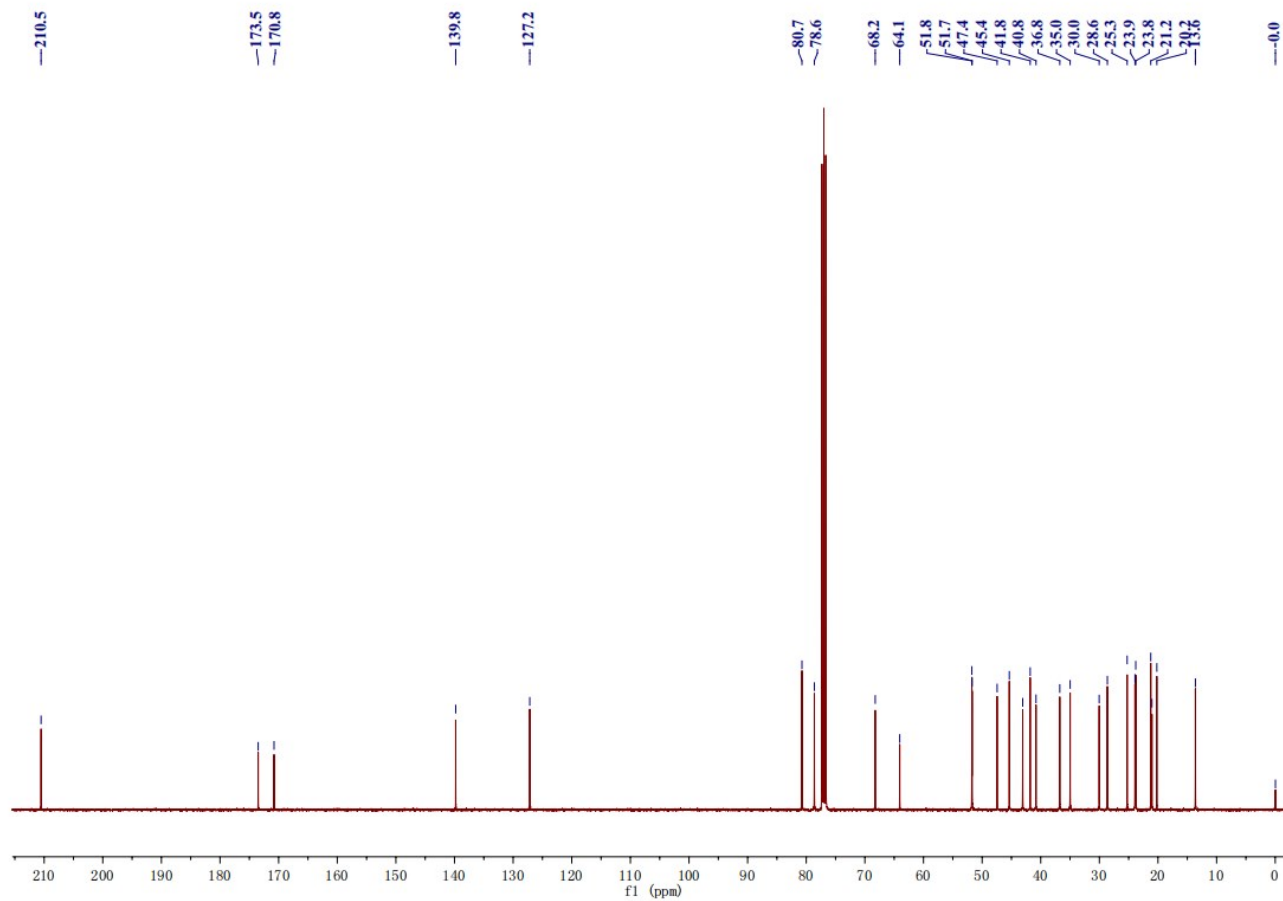



**Figure S21.** HSQC spectrum of Pycnidiophorone D (**4**; 600 MHz, CDCl<sub>3</sub>)

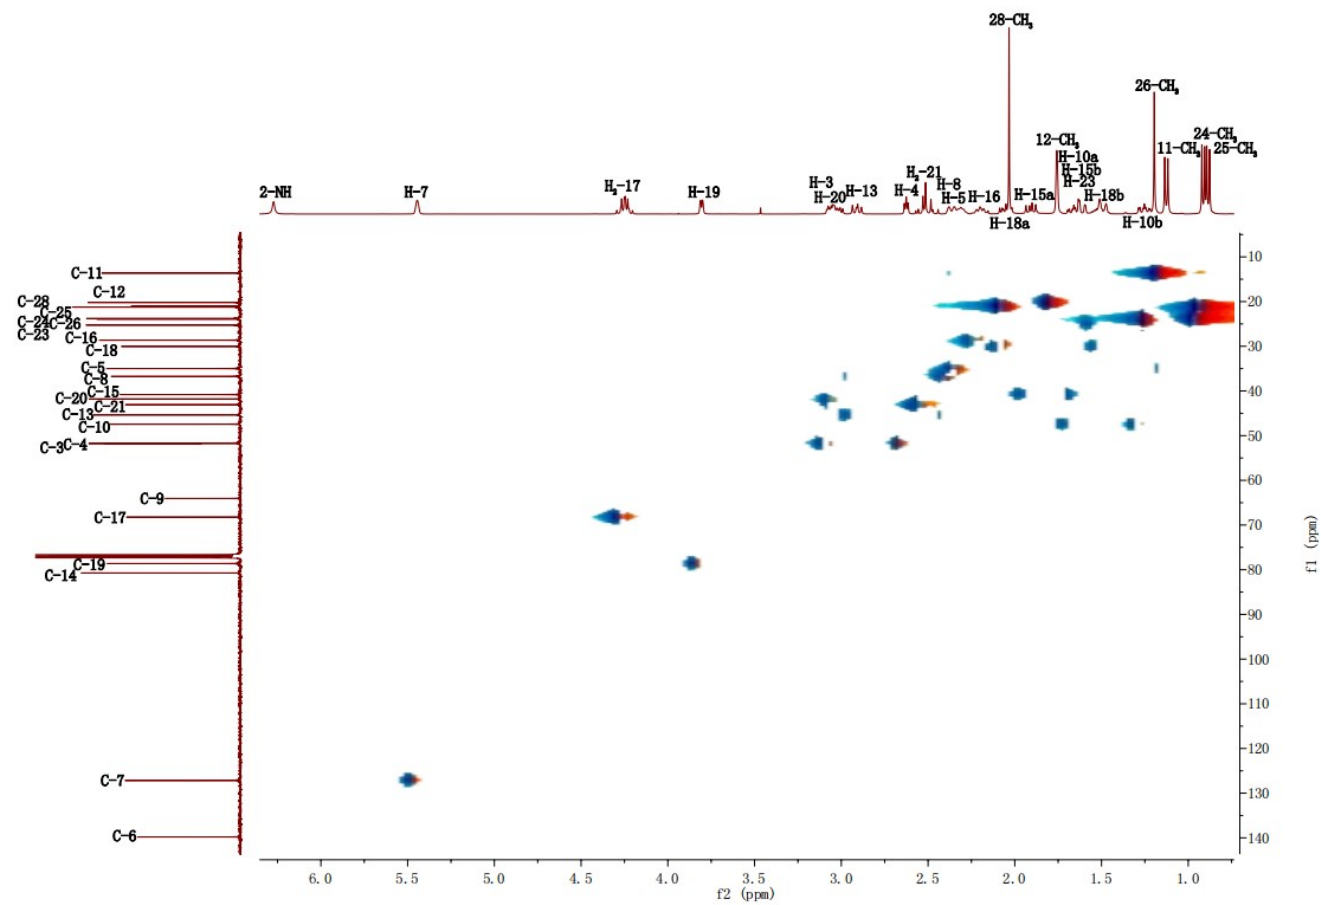

**Figure S22.**  $^1\text{H}$ - $^1\text{H}$  COSY spectrum of Pycnidiophorone D (**4**; 600 MHz,  $\text{CDCl}_3$ )

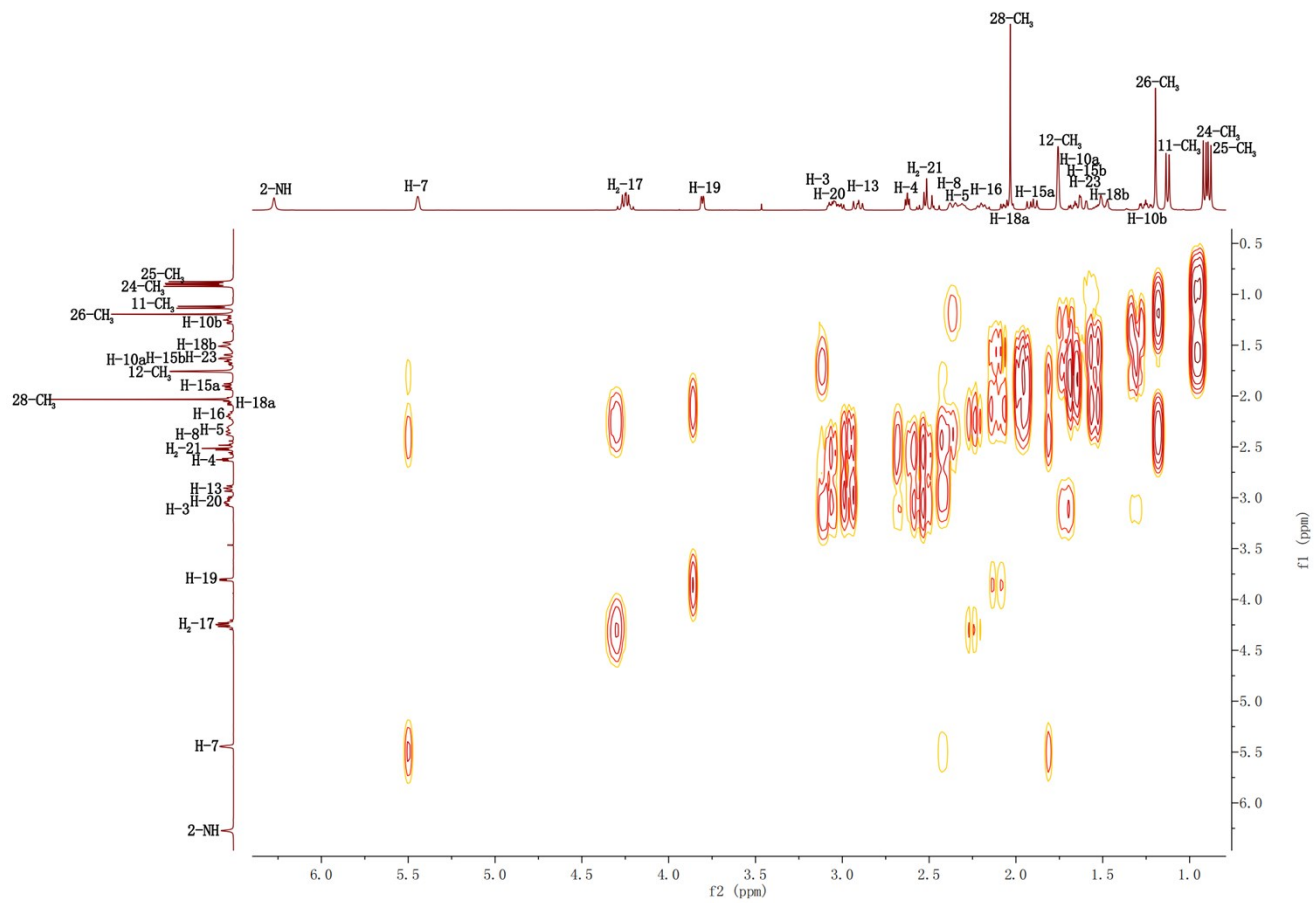

**Figure S23.** HMBC spectrum of Pycnidiophorone D (**4**; 600 MHz, CDCl<sub>3</sub>)

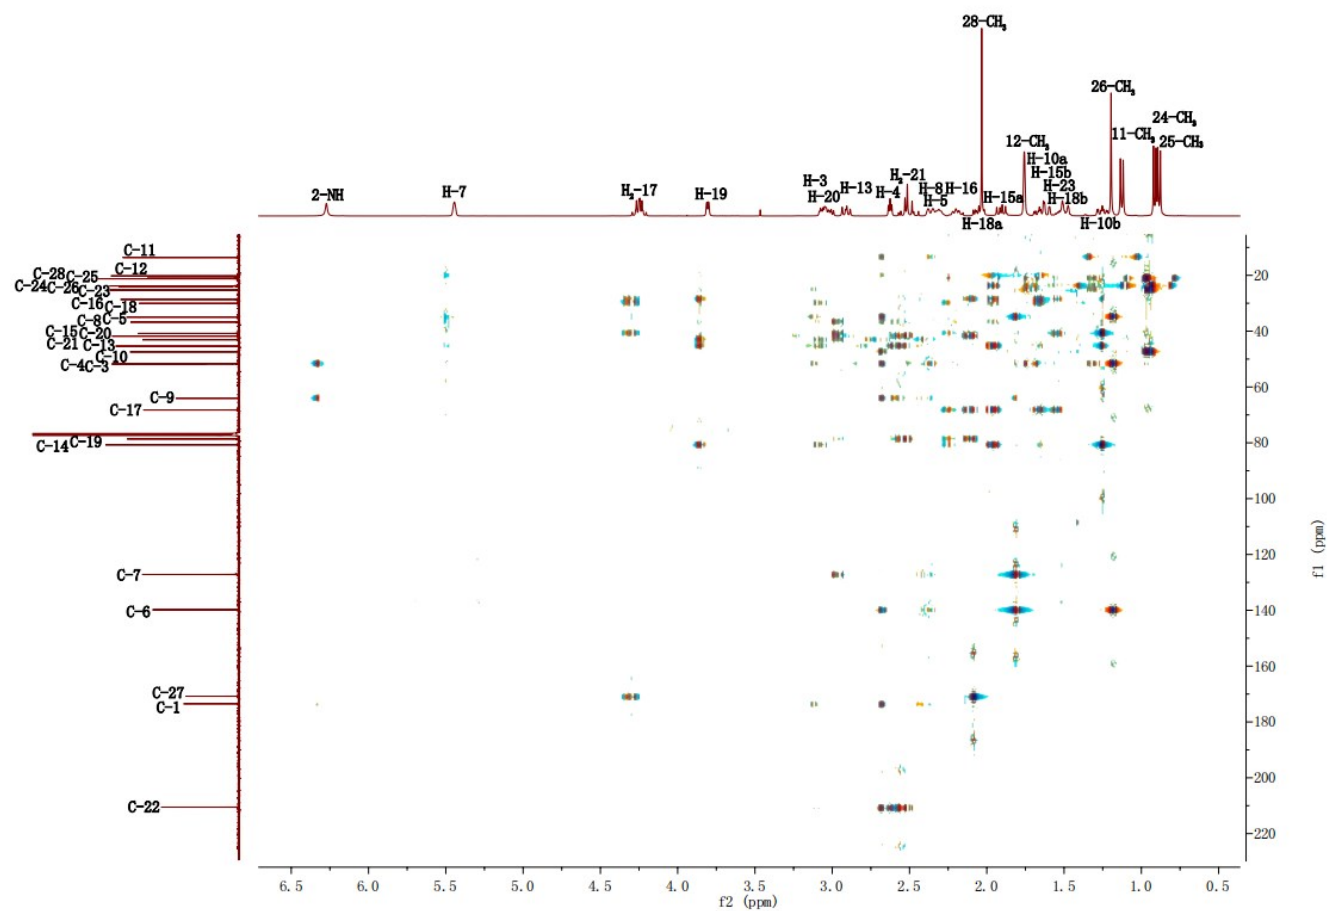

**Figure S24.** NOESY spectrum of Pycnidiophorone D (**4**; 600 MHz, CDCl<sub>3</sub>)

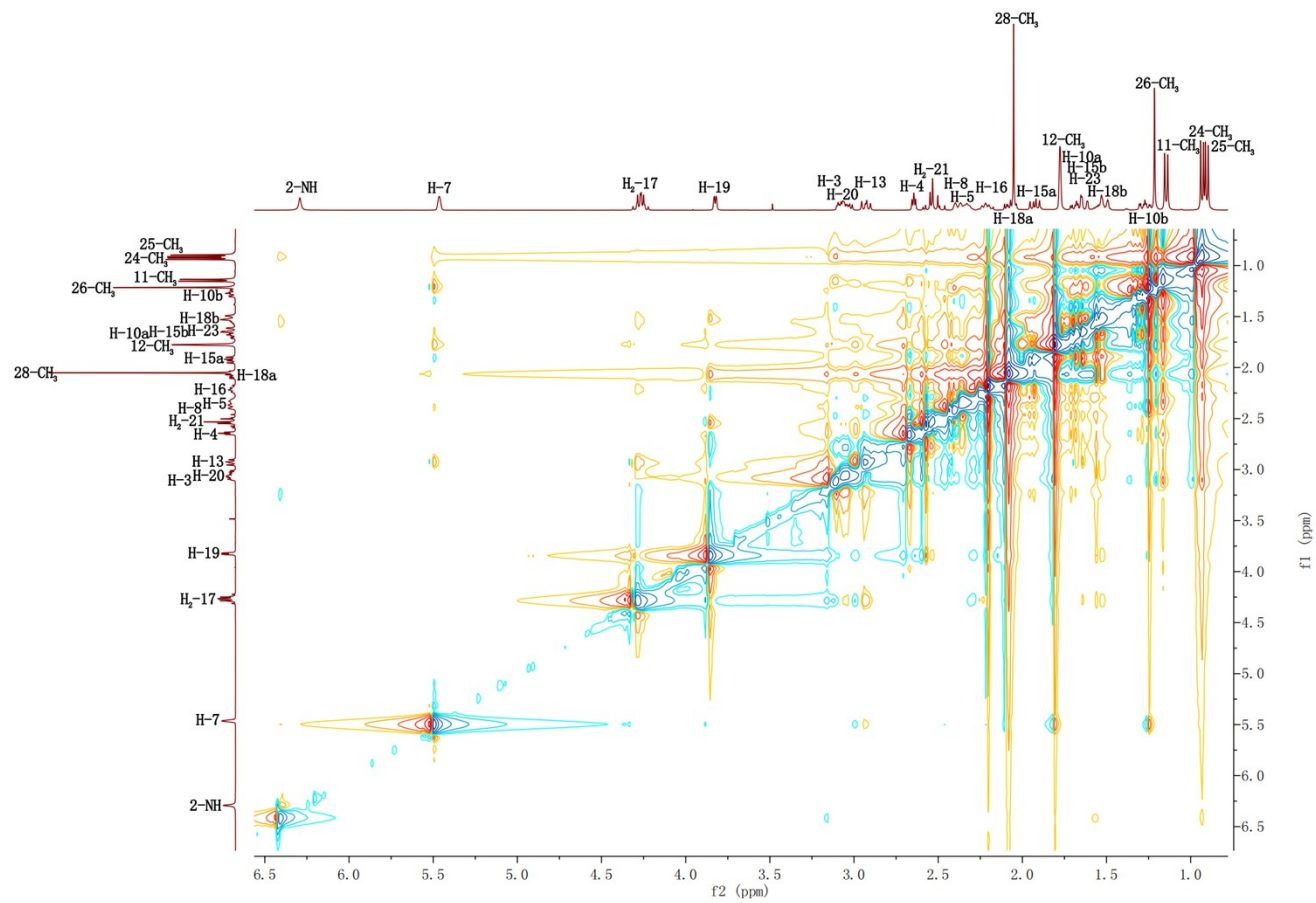

**Figure S25.** Relative Configurations and the Optimized Conformers for **1**

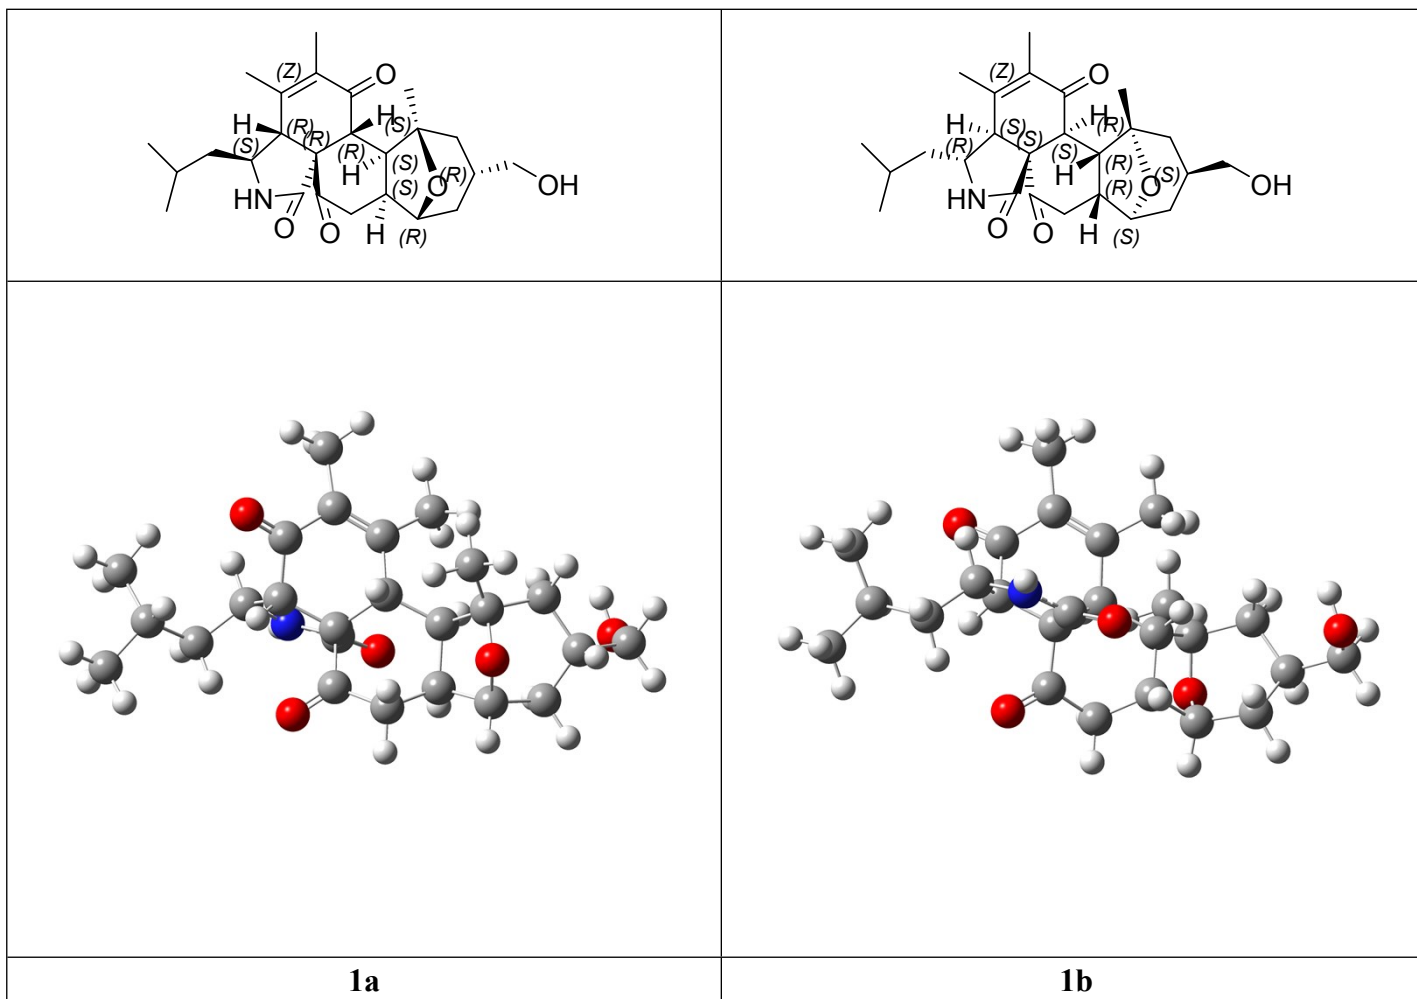

**Figure S26.** Relative Configurations and the Optimized Conformers for **3**

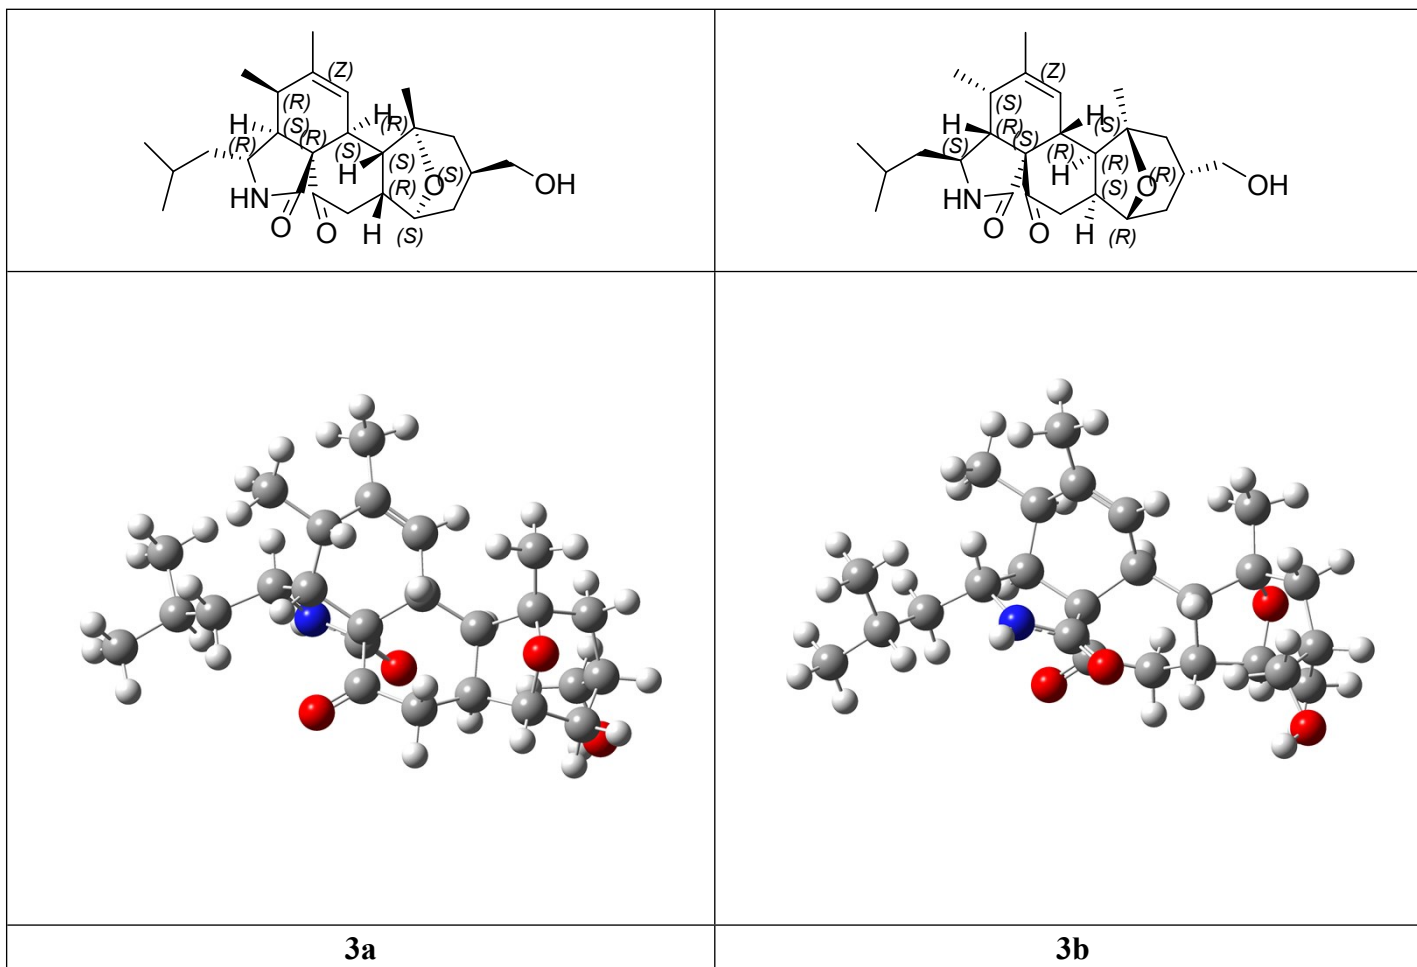

**Figure S27.** UV Spectrum of Pycnidiophorone A (**1**) in MeOH

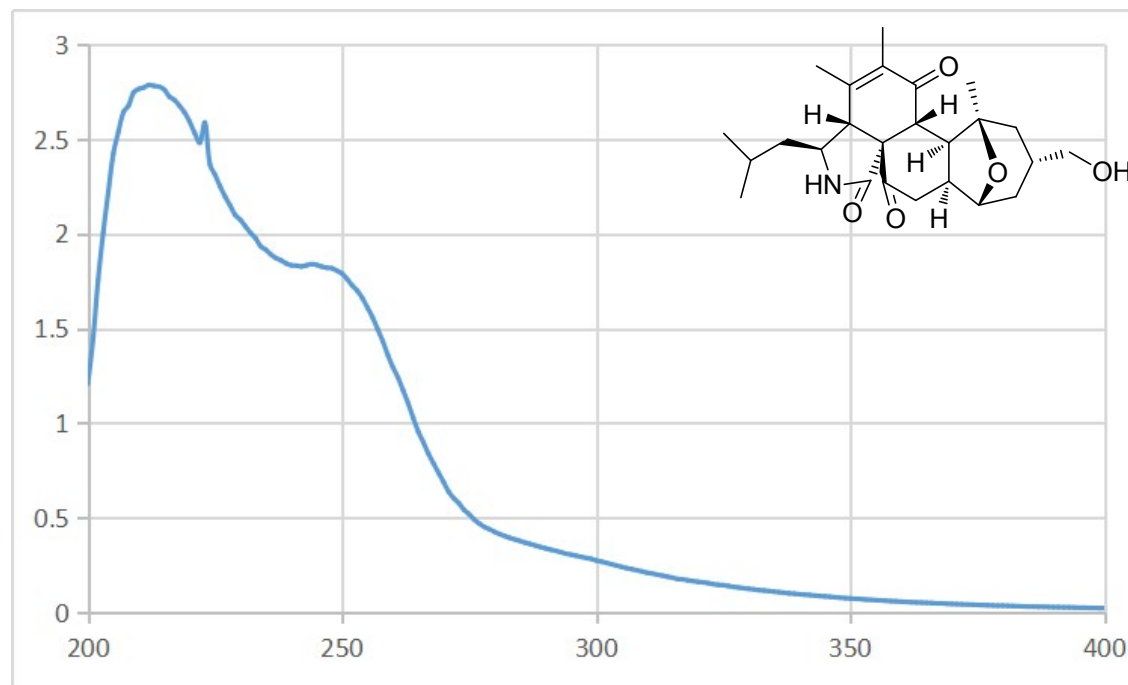

**Figure S28.** UV Spectrum of Pycnidiophorone B (**2**) in MeOH

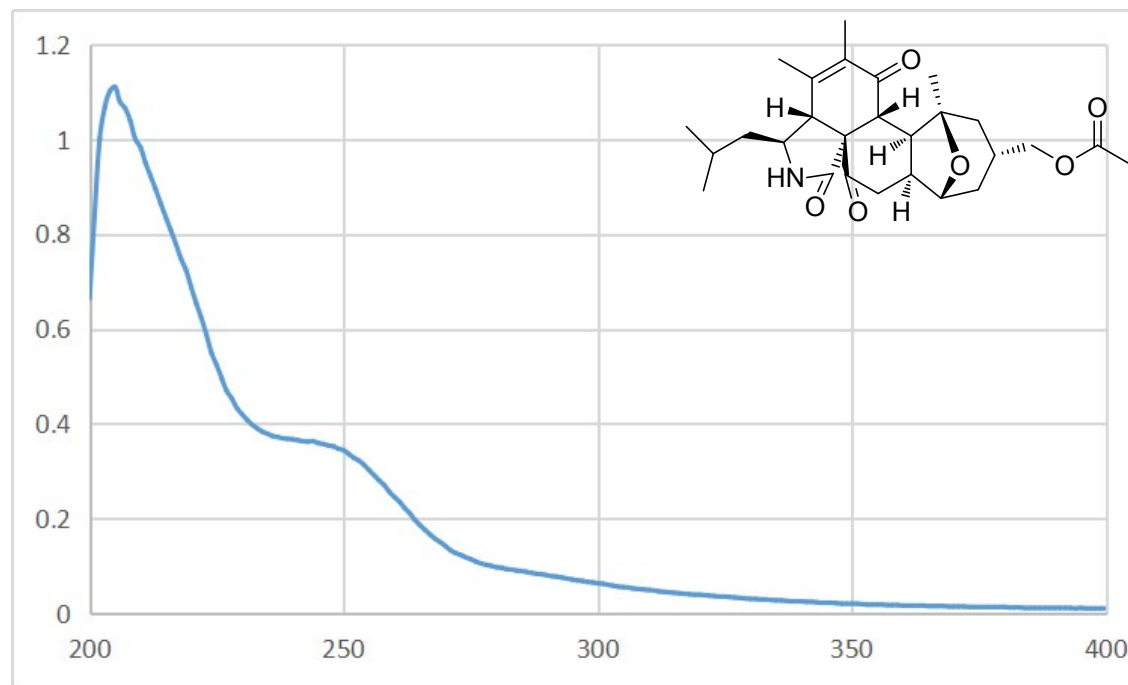



**Figure S29.** UV Spectrum of Pycnidiophorone C (**3**) in MeOH

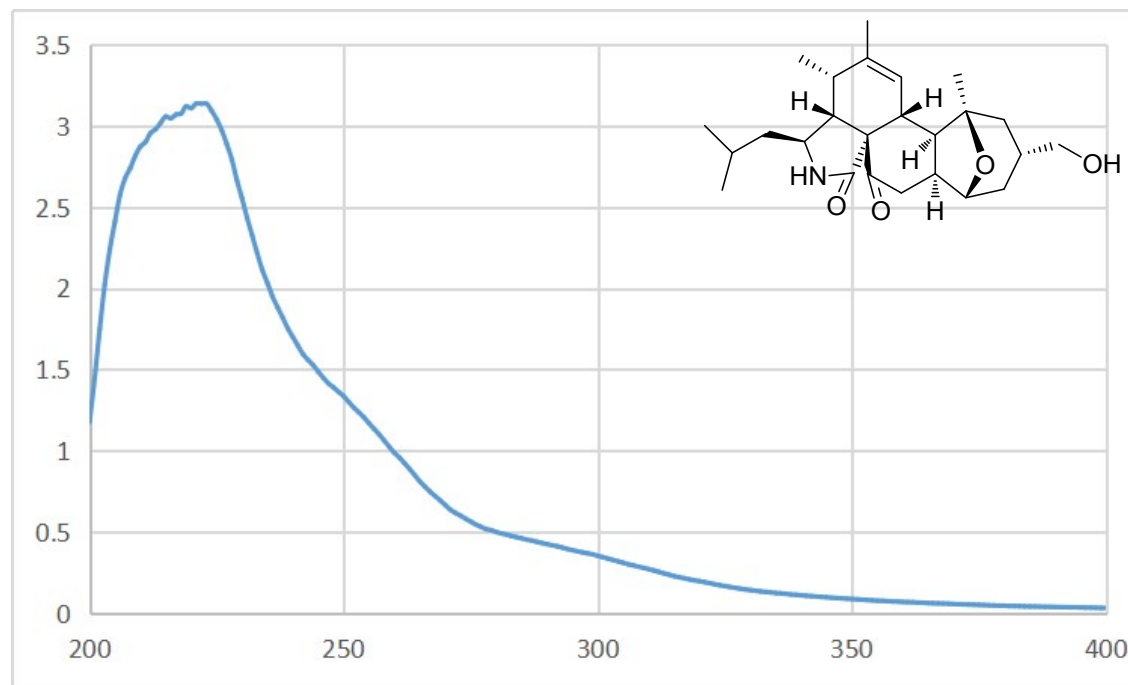

**Figure S30.** UV Spectrum of Pycnidiophorone D (**4**) in MeOH

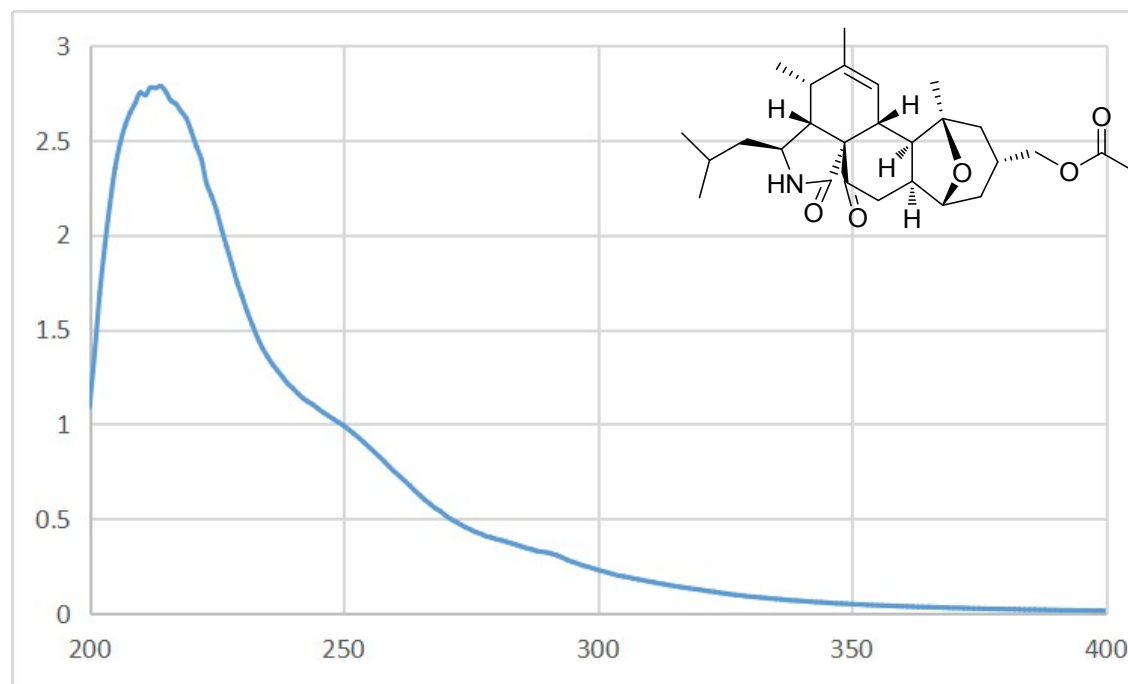

**Figure S31.** CD Spectrum of Pycnidiophorone A (**1**) in MeOH

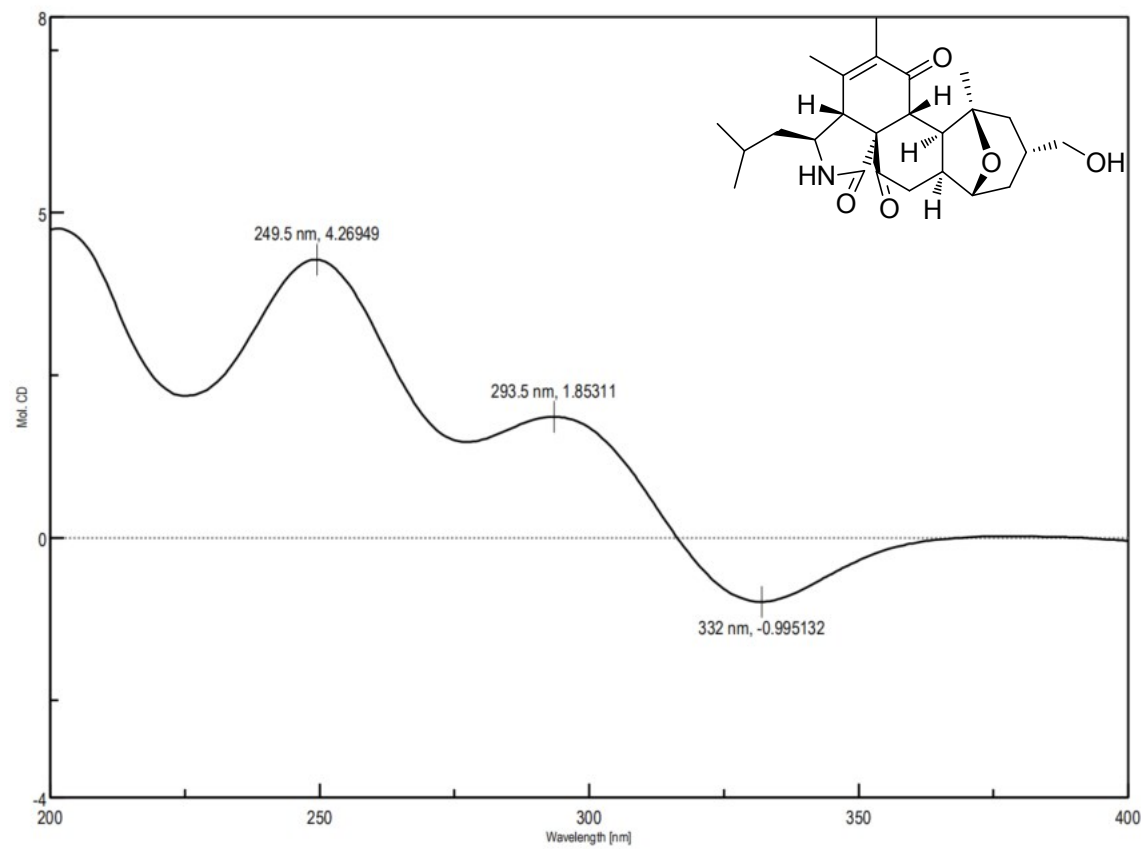

**Figure S32.** CD Spectrum of Pycnidiophorone B (**2**) in MeOH

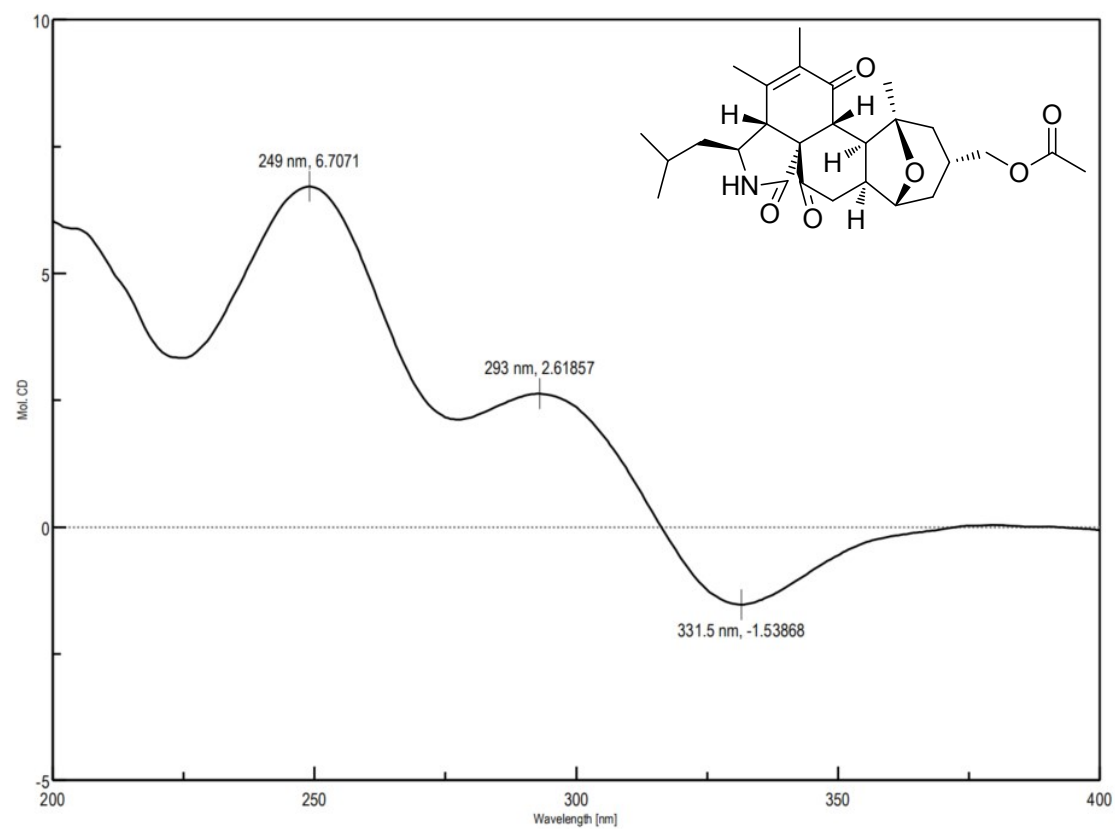

**Figure S33.** CD Spectrum of Pycnidiophorone C (**3**) in MeOH

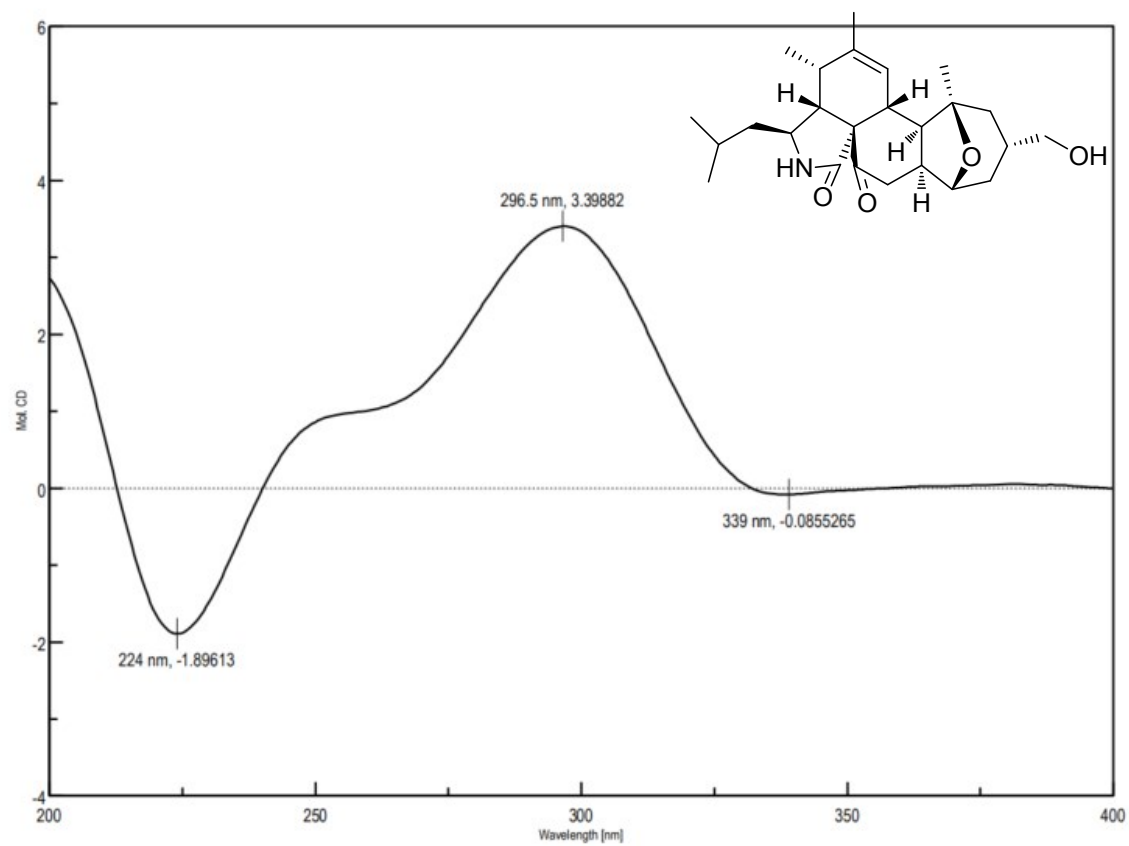

**Figure S34.** CD Spectrum of Pycnidiophorone D (**4**) in MeOH

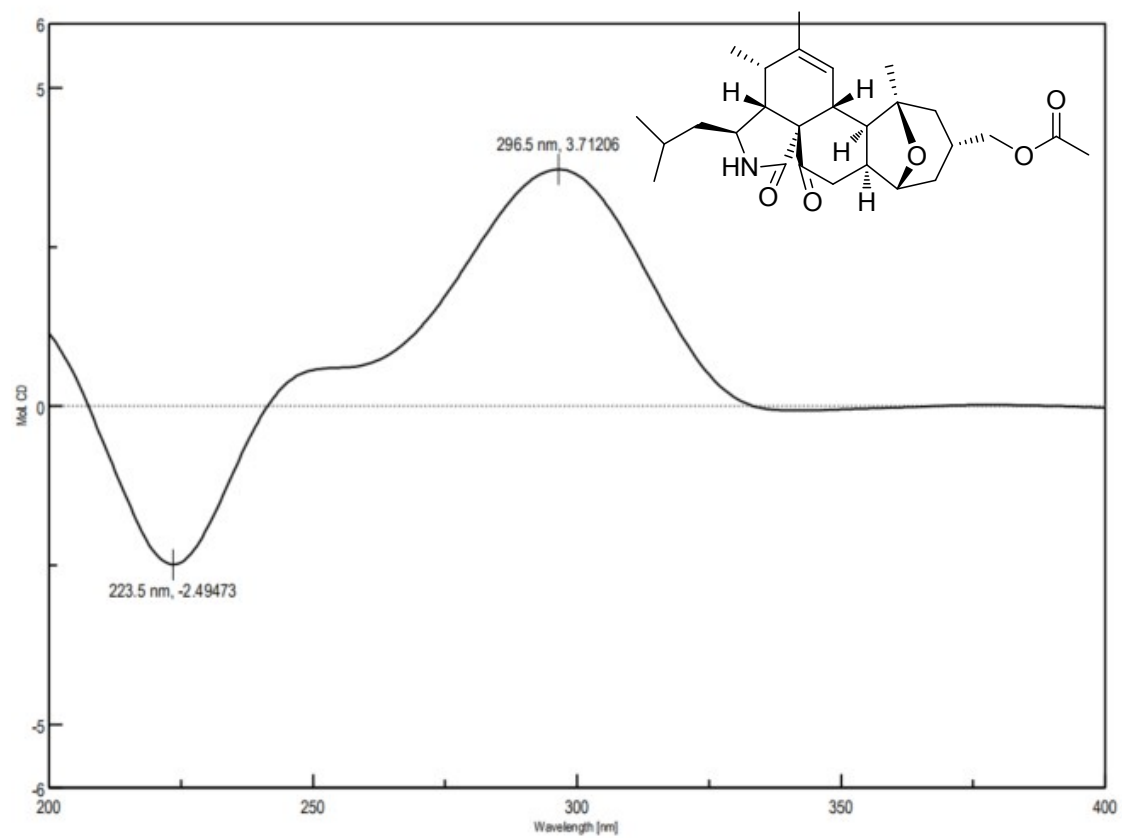

Figure S35. IR Spectrum of Pycnidiophorone A (1)

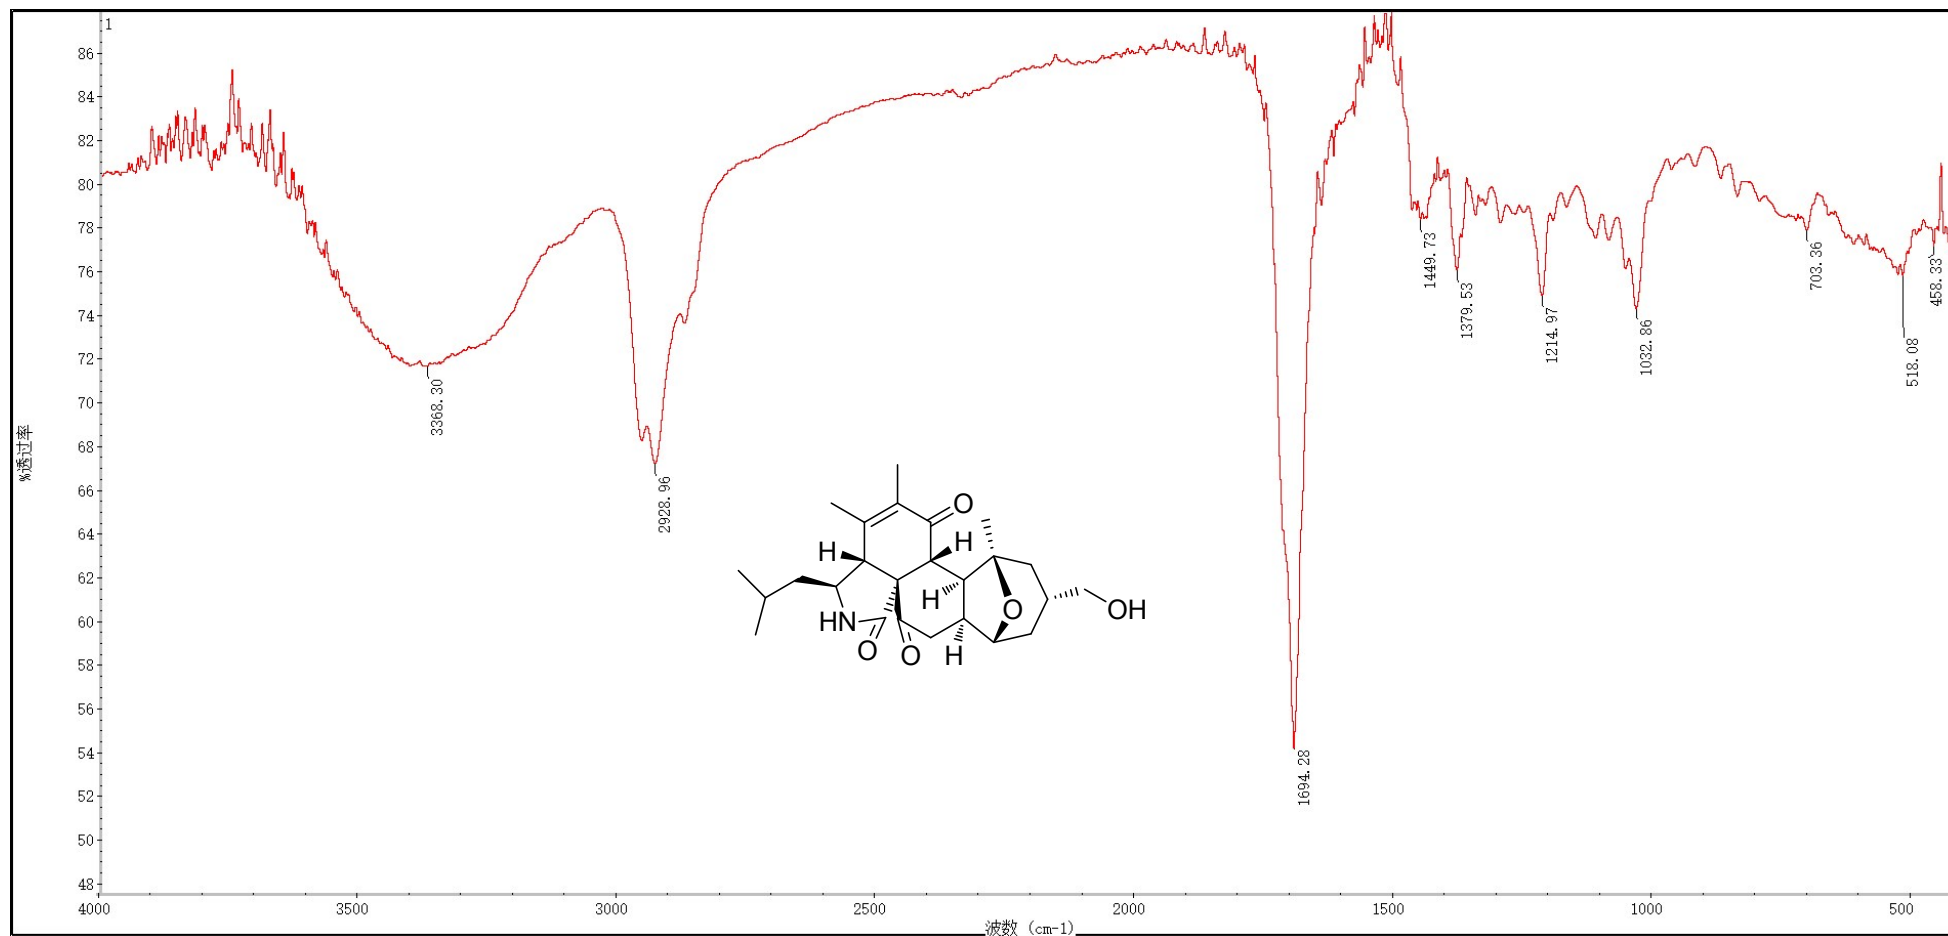

Figure S36. IR Spectrum of Pycnidiophorone B (2)

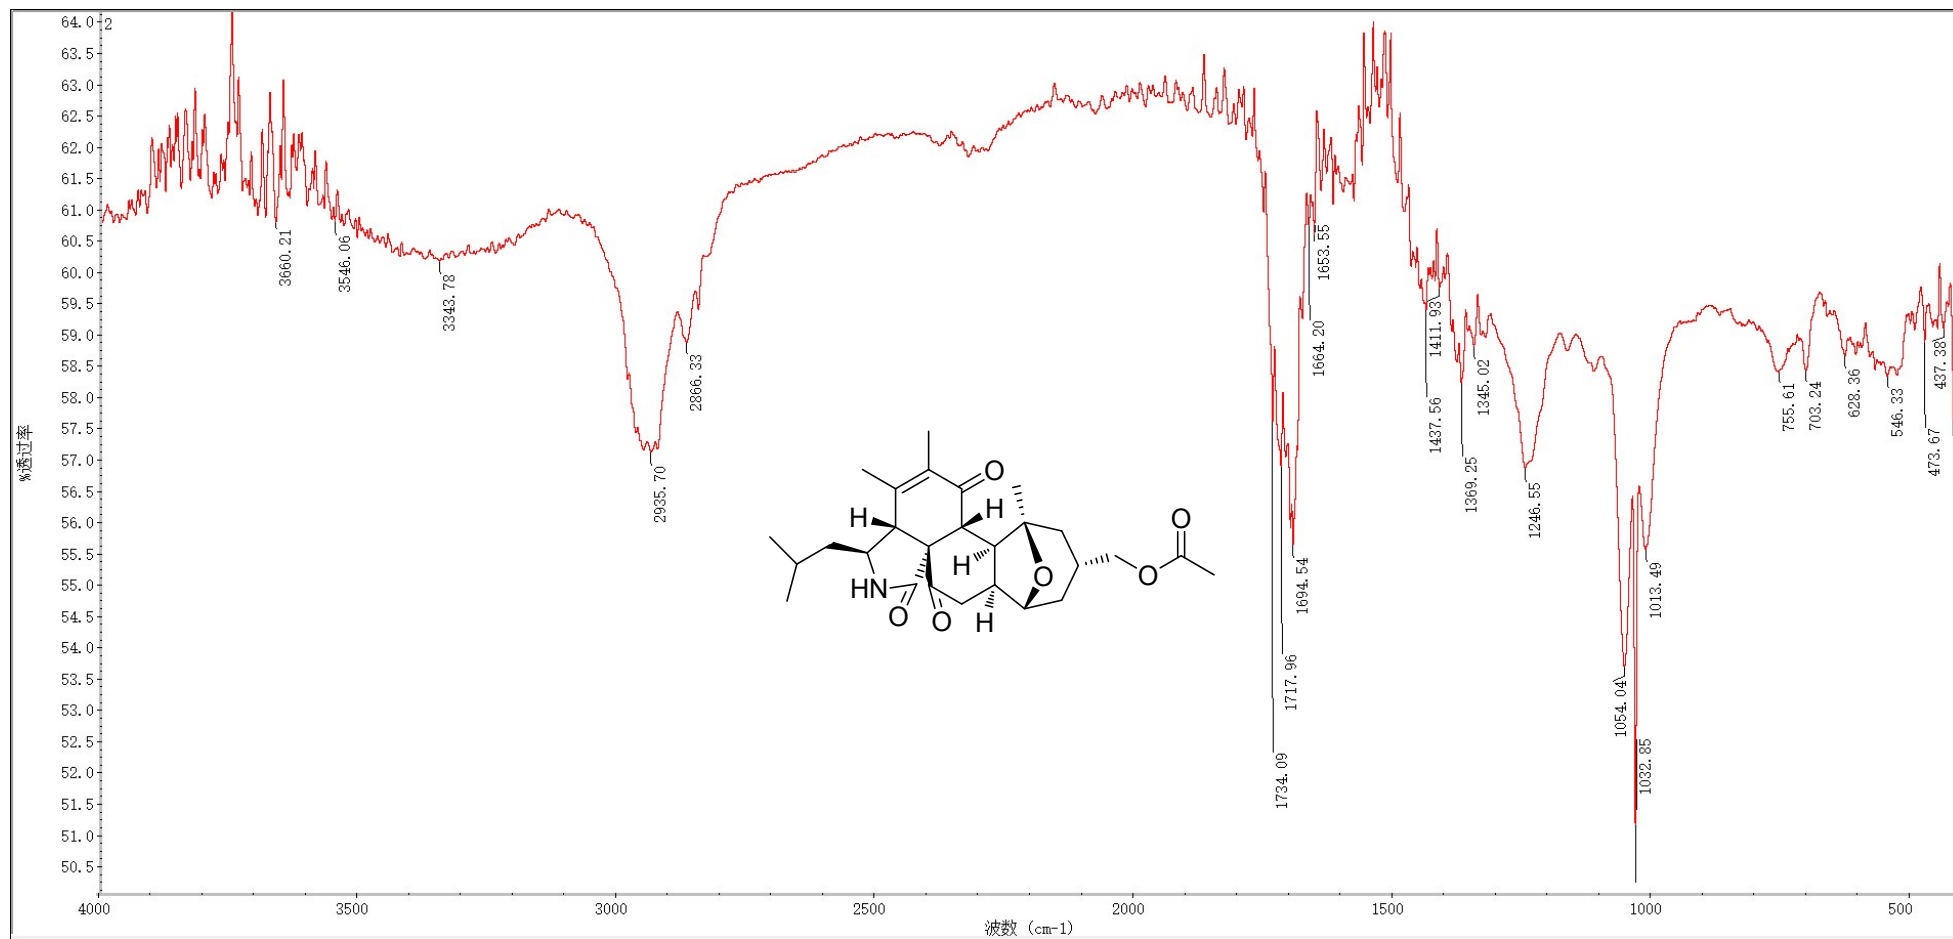



Figure S37. IR Spectrum of Pycnidiophorone C (3)

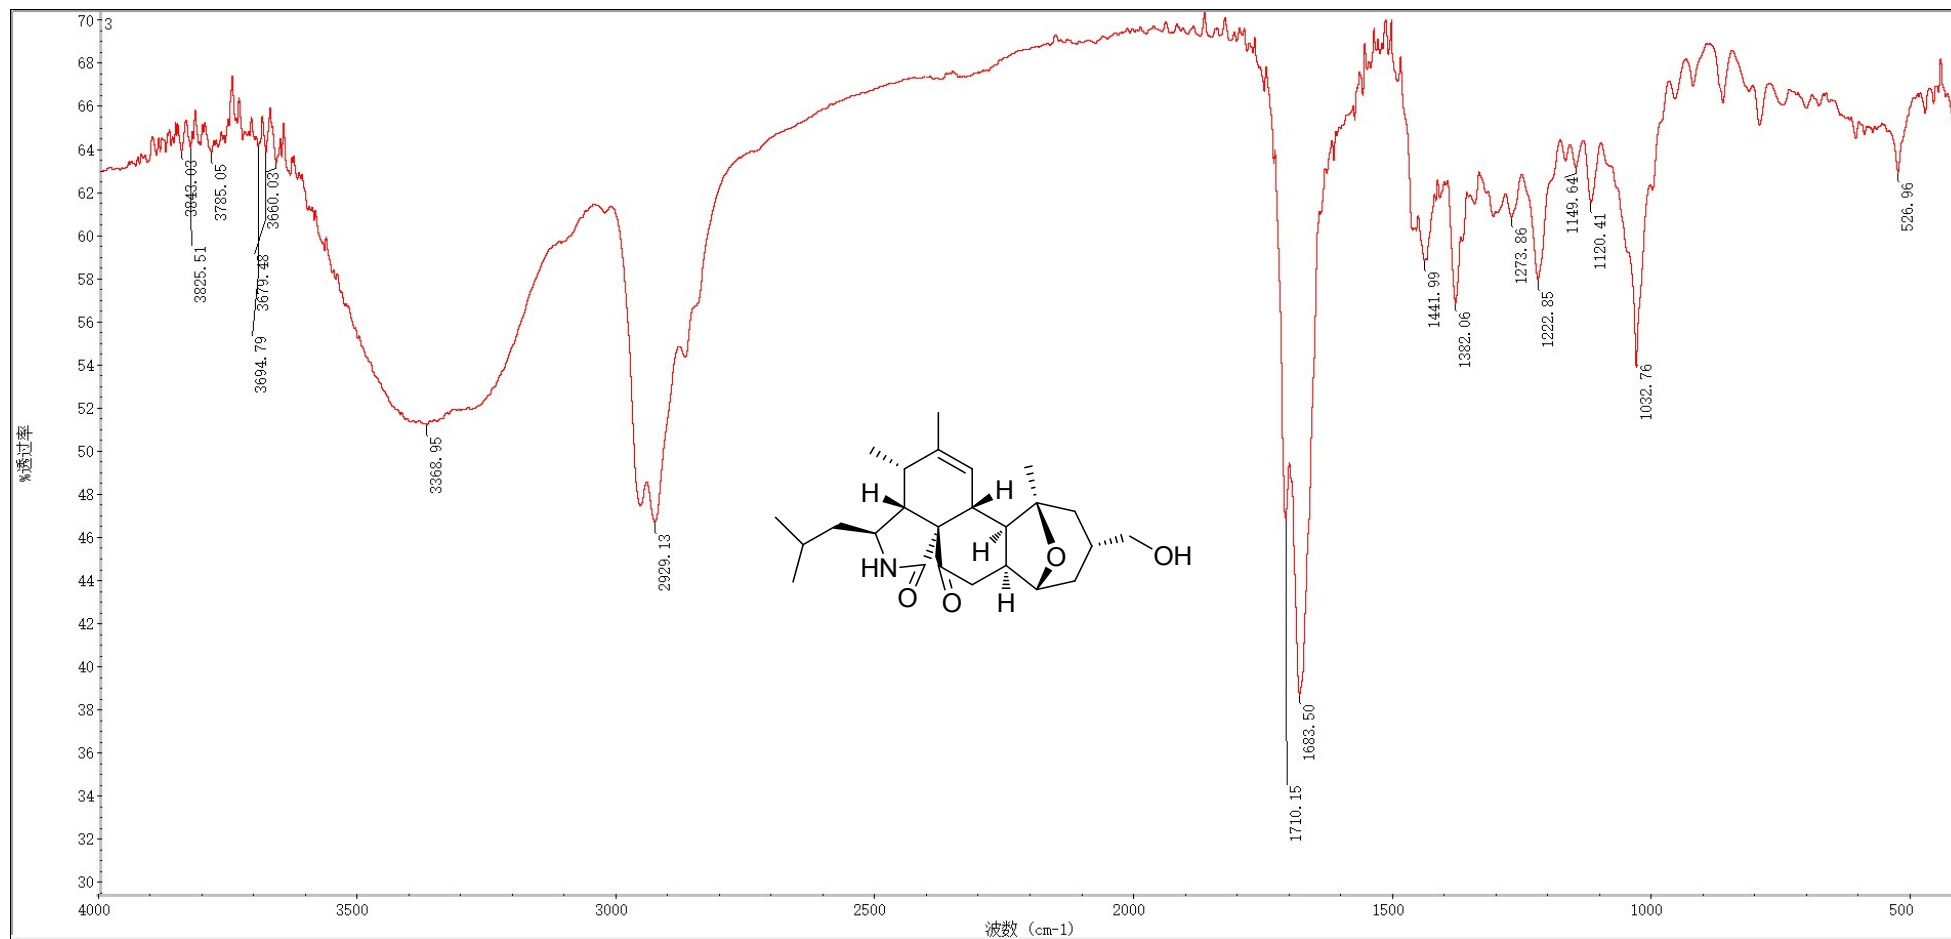

Figure S38. IR Spectrum of Pycnidiophorone D (4)

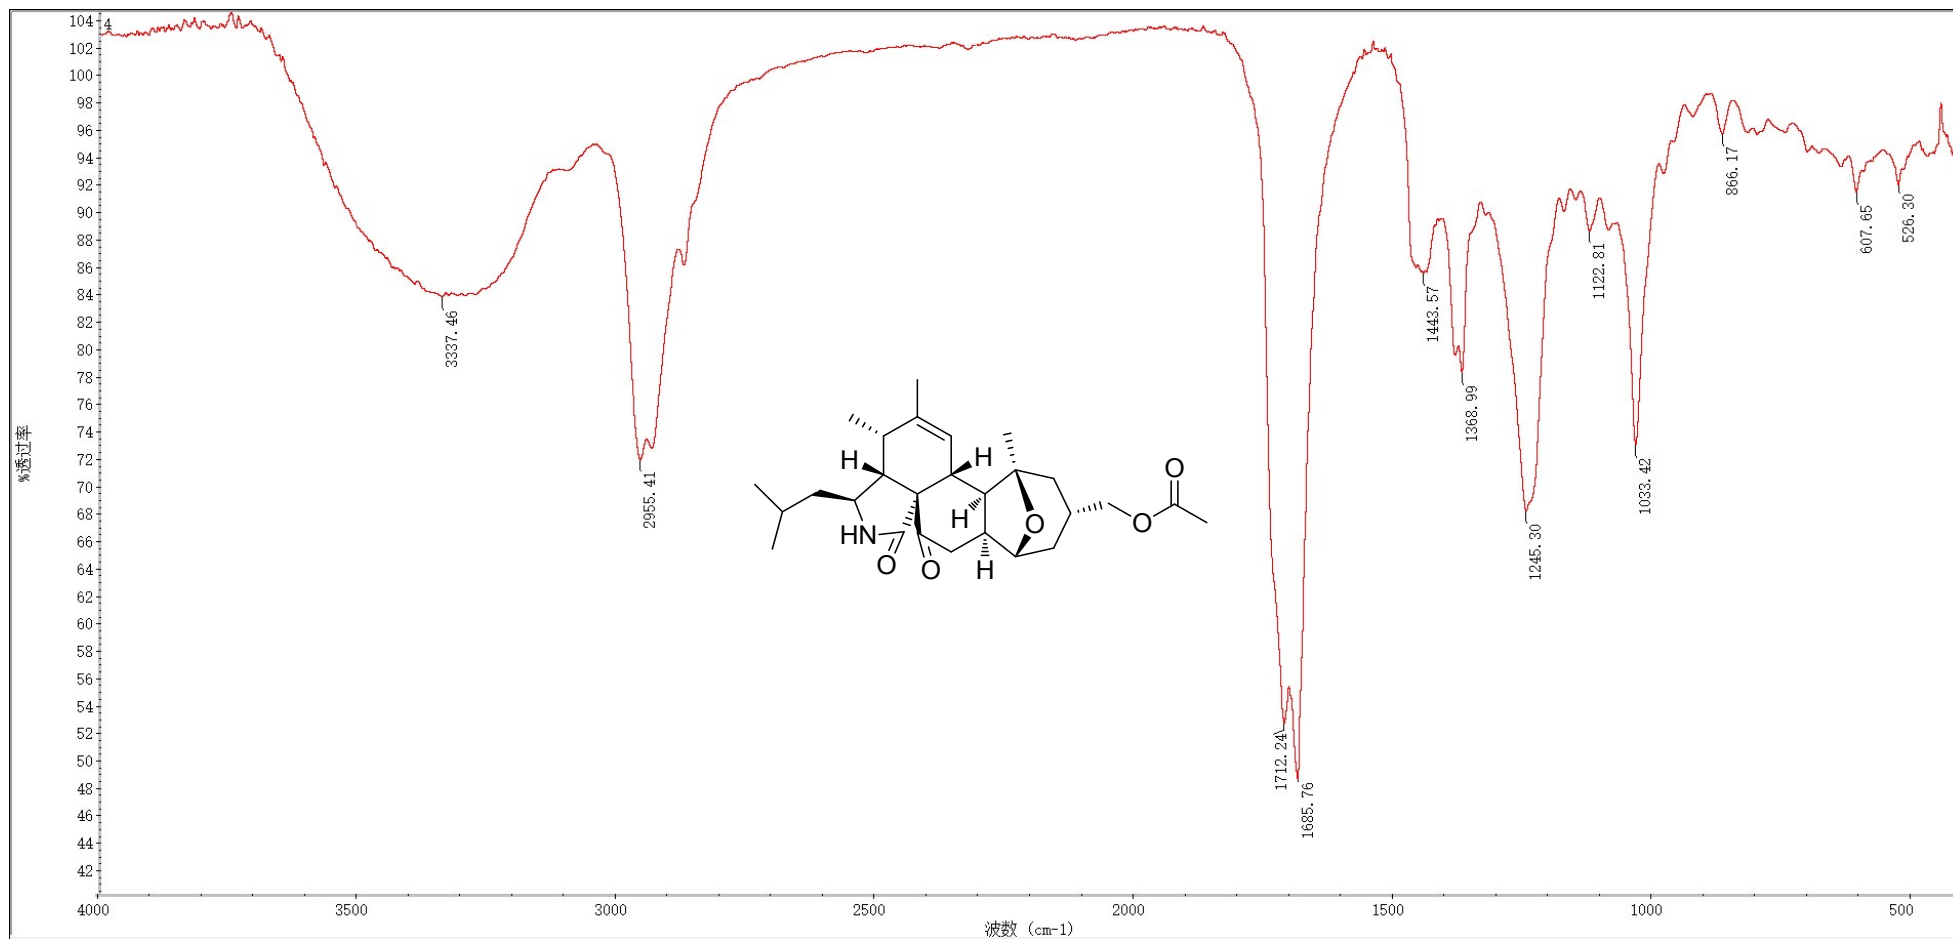

**Figure S39. HRESIMS Spectrum of Pycnidiophorone A (1)**

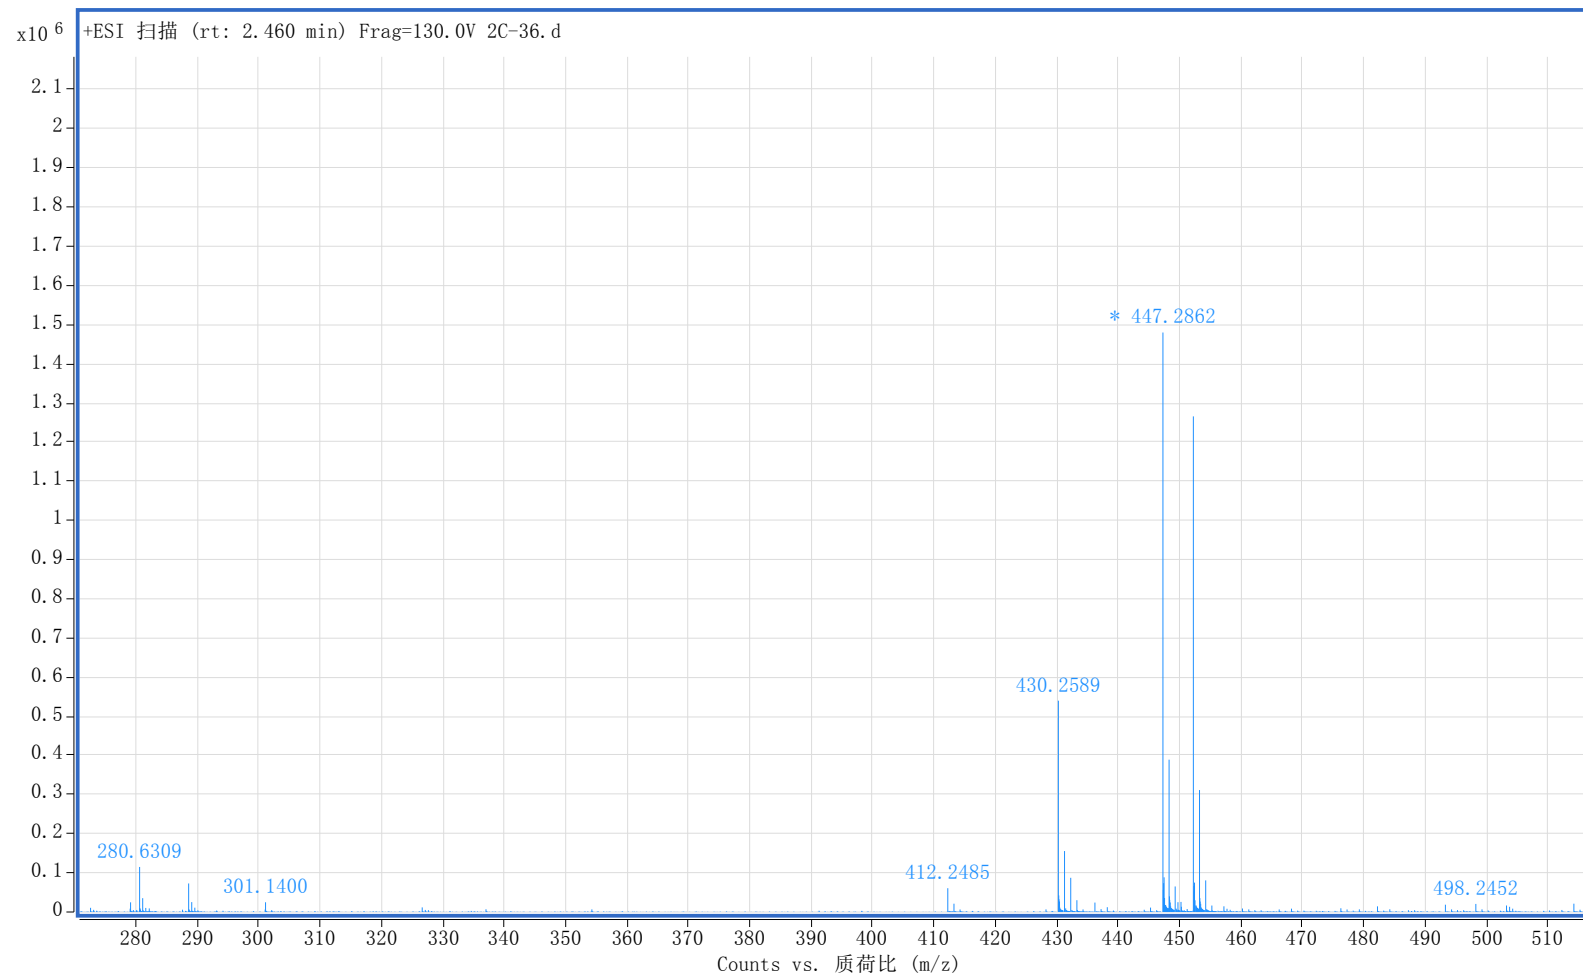

**Figure S40. HRESIMS Spectrum of Pycnidiophorone B (2)**

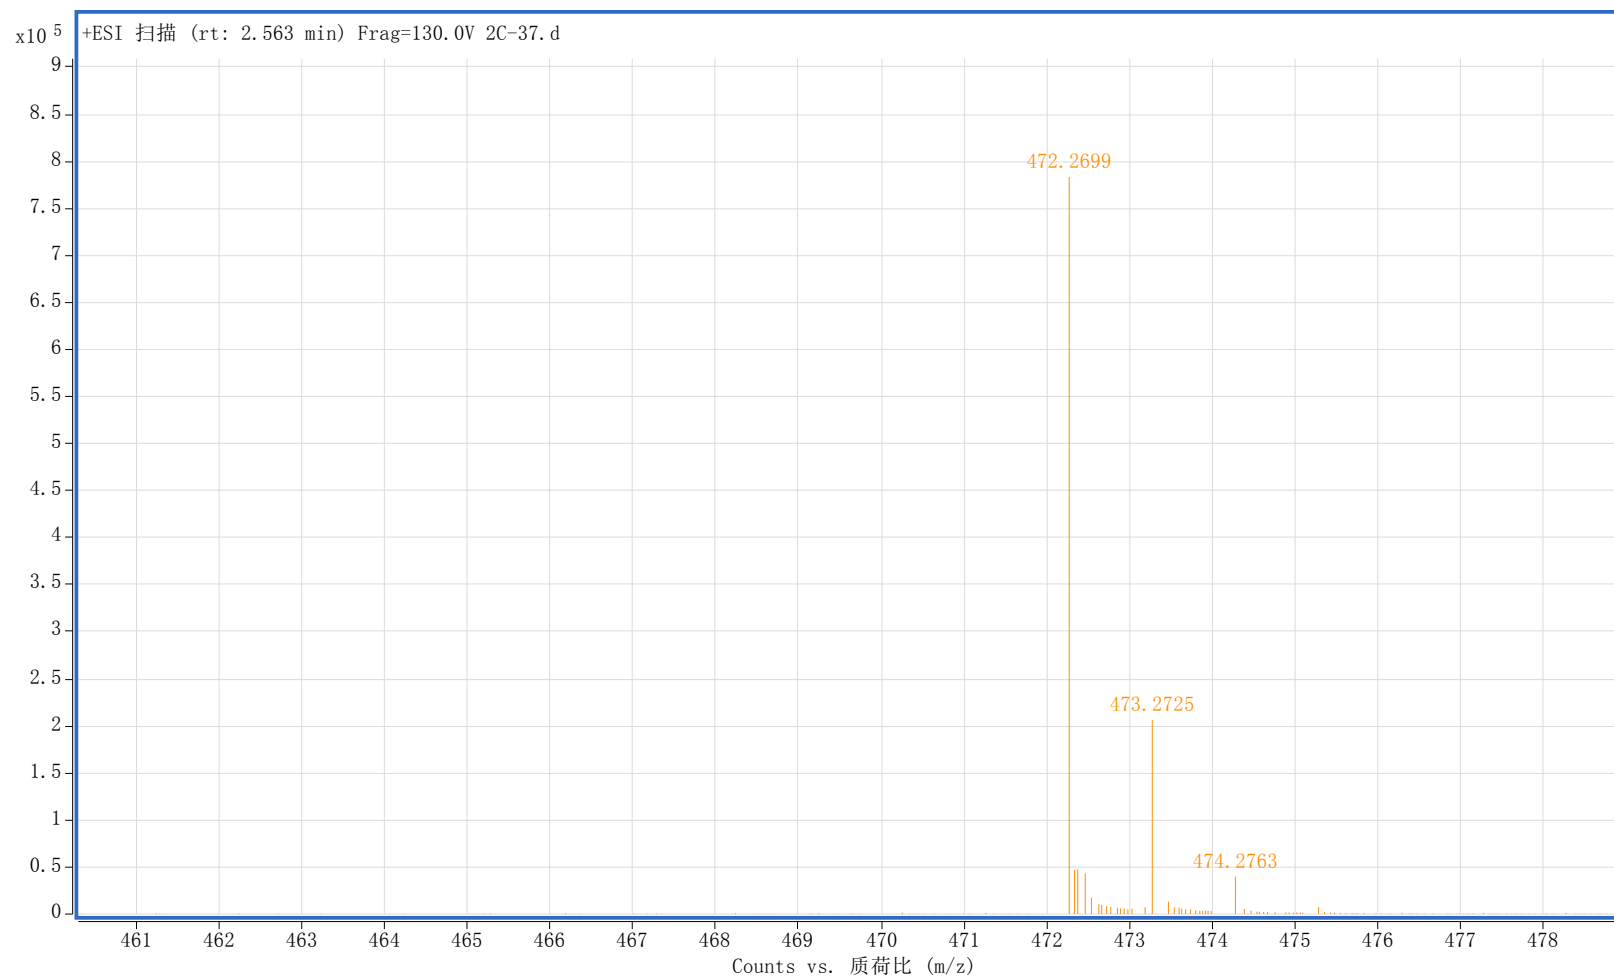

**Figure S41. HRESIMS Spectrum of Pycnidiophorone C (3)**

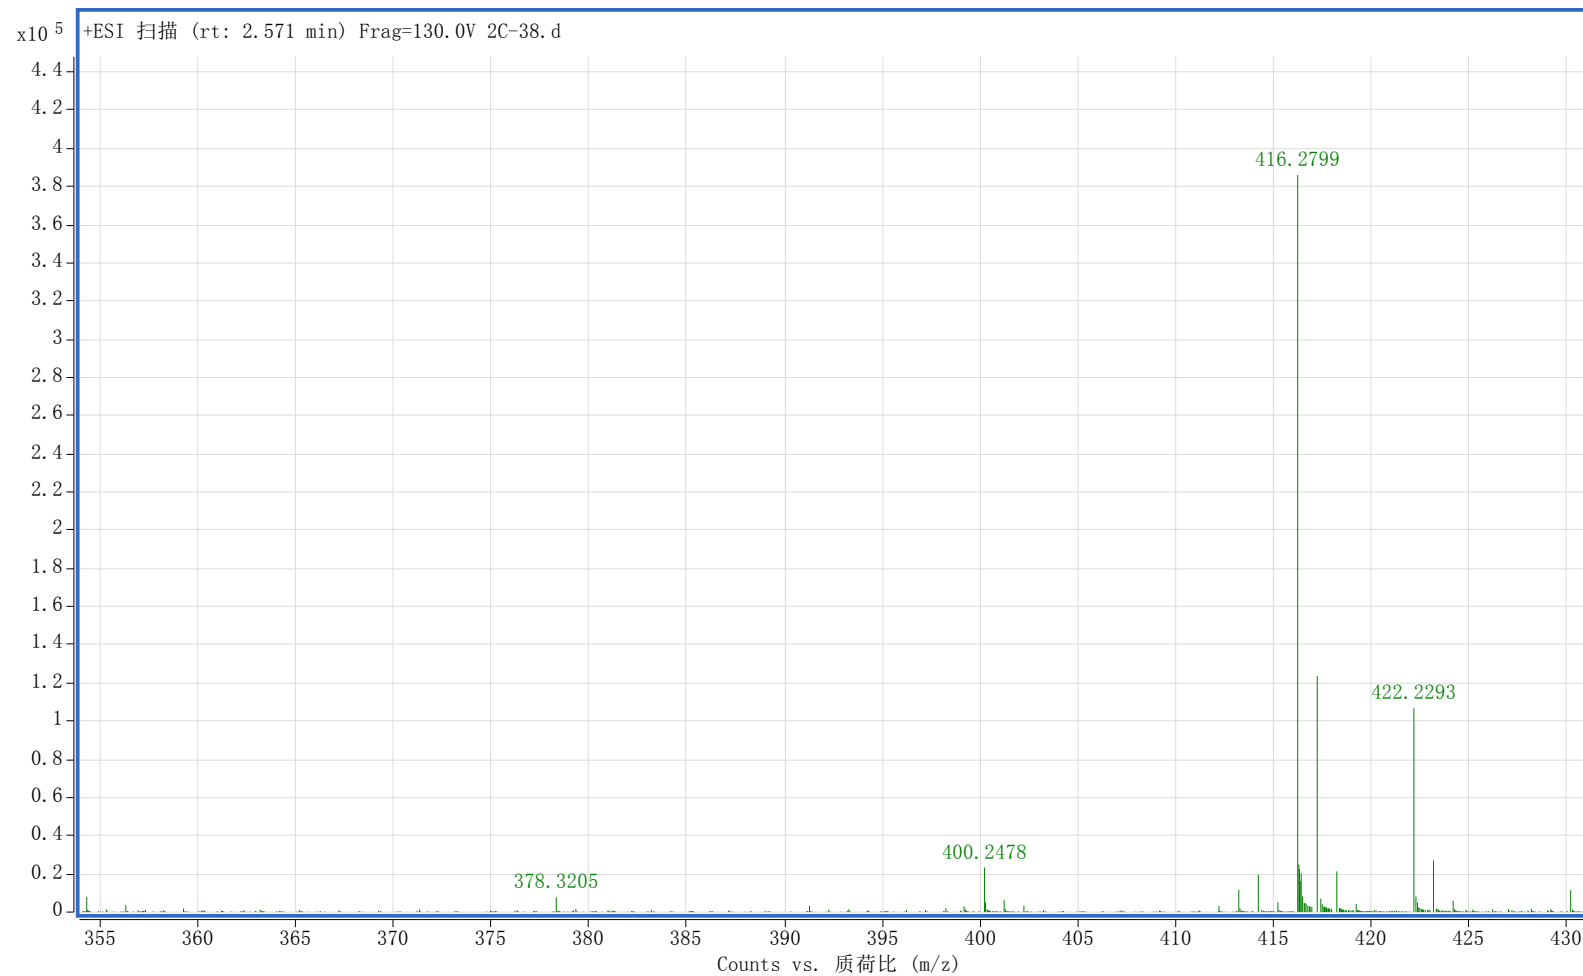

**Figure S42. HRESIMS Spectrum of Pycnidiophorone D (4)**

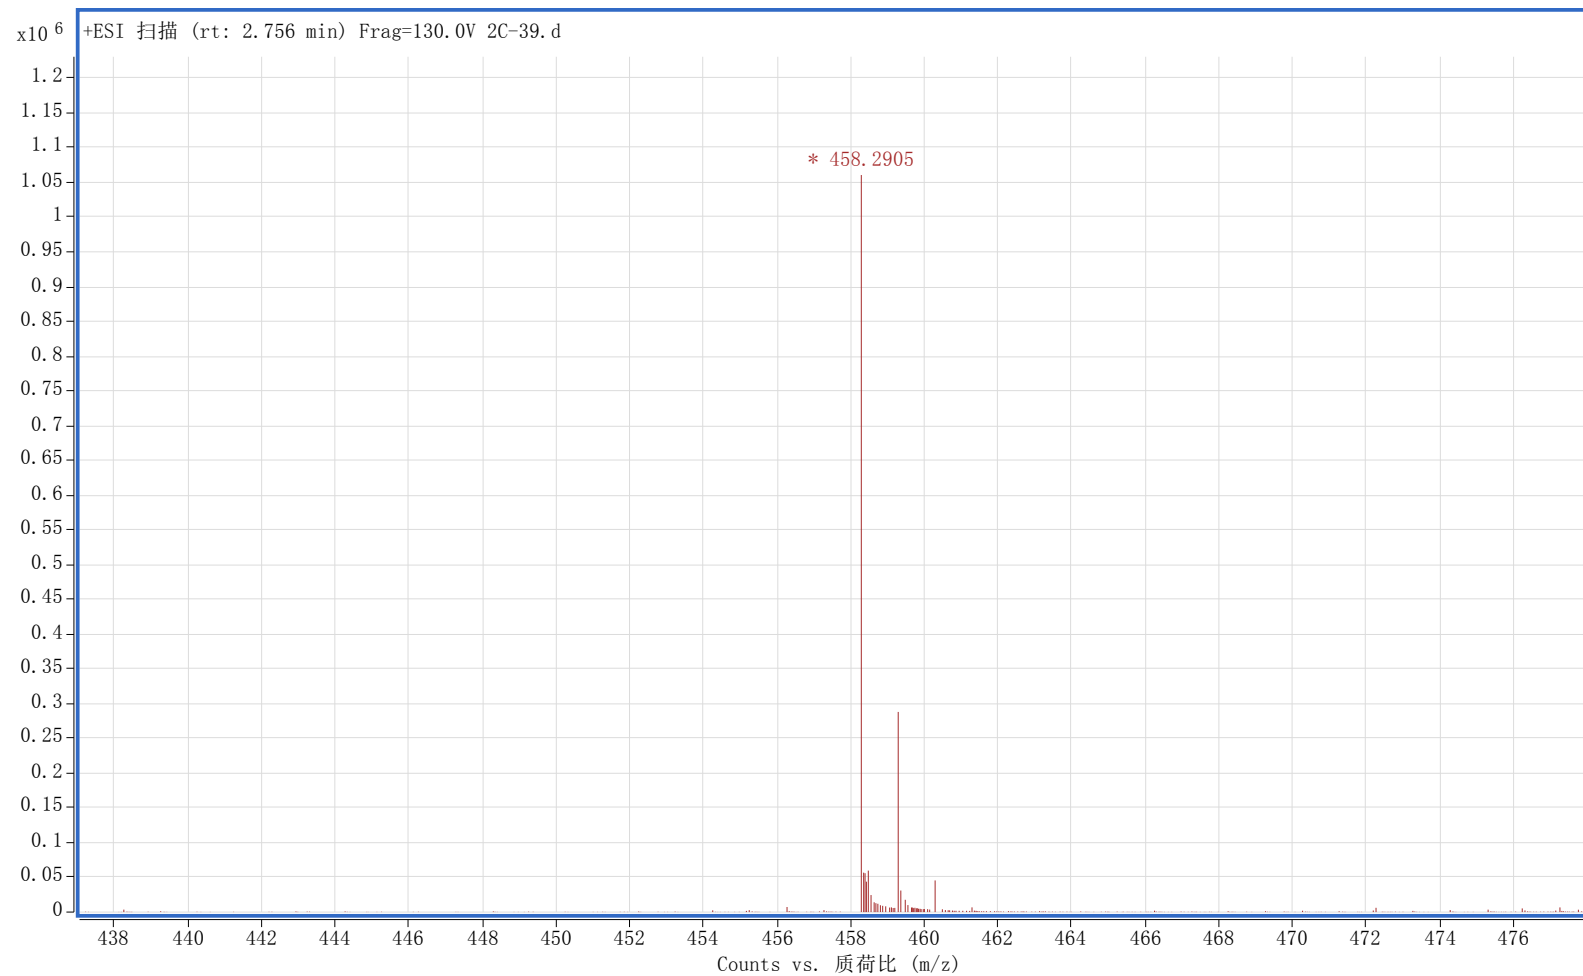

Supplement: RA-010-D0RA08072A-s001.pdf [file RA-010-D0RA08072A-s001.pdf]
